# Supplementary material for: Secondary Metabolites with Herbicidal and Antifungal Activities from Marine-Derived Fungus Alternaria iridiaustralis
Source: MDPI journal article supplement (doi:10.3390/jof9070716), 2023-06-29
Supplement: s1 [file s1]

# Secondary Metabolites with Herbicidal and Antifungal Activities from Marine-Derived Fungus *Alternaria iridiauxalis*

Jin-qing Fan <sup>1,†</sup>, Fang-fang Guo <sup>1,†</sup>, Chen Zhao <sup>1</sup>, Hong Li <sup>1</sup>, Tian-li Qu <sup>2</sup>, Lin Xiao <sup>2,\*</sup> and Feng-yu Du <sup>2,3\*</sup>

## Contents

|                                                                                                                                                      |     |
|------------------------------------------------------------------------------------------------------------------------------------------------------|-----|
| Figure S1. HRESIMS spectrum of compound 1.                                                                                                           | S2  |
| Figure S2. <sup>1</sup> H NMR (500 MHz, CD <sub>3</sub> OD) spectrum of compound 1.                                                                  | S3  |
| Figure S3. <sup>13</sup> C NMR spectrum of compound 1.                                                                                               | S3  |
| Figure S4. DEPT-135 spectrum of compound 1.                                                                                                          | S4  |
| Figure S5. HSQC spectrum of compound 1.                                                                                                              | S4  |
| Figure S6. <sup>1</sup> H- <sup>1</sup> H COSY spectrum of compound 1.                                                                               | S5  |
| Figure S7. HMBC spectrum of compound 1.                                                                                                              | S5  |
| Figure S8. NOESY spectrum of compound 1.                                                                                                             | S6  |
| Figure S9. HRESIMS spectrum of compound 3.                                                                                                           | S7  |
| Figure S10. <sup>1</sup> H NMR (500 MHz, CD <sub>3</sub> OD) spectrum of compound 3.                                                                 | S8  |
| Figure S11. <sup>13</sup> C NMR spectrum of compound 3.                                                                                              | S8  |
| Figure S12. DEPT-135 spectrum of compound 3.                                                                                                         | S9  |
| Figure S13. HSQC spectrum of compound 3.                                                                                                             | S9  |
| Figure S14. <sup>1</sup> H- <sup>1</sup> H COSY spectrum of compound 3.                                                                              | S10 |
| Figure S15. HMBC spectrum of compound 3.                                                                                                             | S10 |
| Figure S16. NOESY spectrum of compound 3.                                                                                                            | S11 |
| Figure S17. HRESIMS spectrum of compound 5.                                                                                                          | S12 |
| Figure S18. <sup>1</sup> H NMR (500 MHz, CDCl <sub>3</sub> ) spectrum of compound 5.                                                                 | S13 |
| Figure S19. <sup>13</sup> C NMR spectrum of compound 5.                                                                                              | S13 |
| Figure S20. DEPT-135 spectrum of compound 5.                                                                                                         | S14 |
| Figure S21. HSQC spectrum of compound 5.                                                                                                             | S14 |
| Figure S22. HMBC spectrum of compound 5.                                                                                                             | S15 |
| Figure S23. HRESIMS spectrum of compound 6.                                                                                                          | S16 |
| Figure S24. <sup>1</sup> H NMR (500 MHz, CD <sub>3</sub> OD) spectrum of compound 6.                                                                 | S17 |
| Figure S25. <sup>13</sup> C NMR spectrum of compound 6.                                                                                              | S17 |
| Figure S26. HSQC spectrum of compound 6.                                                                                                             | S18 |
| Figure S27. HMBC spectrum of compound 6.                                                                                                             | S18 |
| Figure S28. HRESIMS spectrum of compound 8.                                                                                                          | S19 |
| Figure S29. <sup>1</sup> H NMR (500 MHz, CDCl <sub>3</sub> ) spectrum of compound 8.                                                                 | S20 |
| Figure S30. <sup>13</sup> C NMR spectrum of compound 8.                                                                                              | S20 |
| Figure S31. DEPT-135 spectrum of compound 8.                                                                                                         | S21 |
| Figure S32. HSQC spectrum of compound 8.                                                                                                             | S21 |
| Figure S33. <sup>1</sup> H- <sup>1</sup> H COSY spectrum of compound 8.                                                                              | S22 |
| Figure S34. HMBC spectrum of compound 8.                                                                                                             | S22 |
| Figure S35. NOESY spectrum of compound 8.                                                                                                            | S23 |
| Figure S36. Optimized geometries of predominant conformers (weighting factors) for compound 1 at the B3LYP/6-311++g(d, p) level above 1% population. | S23 |
| Figure S37. Optimized geometries of predominant conformers (weighting factors) for compound 3 at the B3LYP/6-311++g(d, p) level above 1% population. | S24 |
| Figure S38. Optimized geometries of predominant conformers (weighting factors) for compound 8 at the B3LYP/6-311++g(d, p) level above 1% population. | S24 |
| Figure S39. Regression analyses of experimental versus calculated <sup>13</sup> C NMR chemical shifts of compounds 1, 3 and 8.                       | S24 |

Figure S40. Herbicidal potential of **9** against the radicle growth of *Digitaria sanguinalis* seedlings.

S25

Table S1. Herbicidal spectrum of **9** against representative malignant weeds *D. sanguinalis*, *Portulaca oleracea*, and *Descurainia sophia*.

S25

**Figure S1.** HRESIMS spectrum of compound **1**.

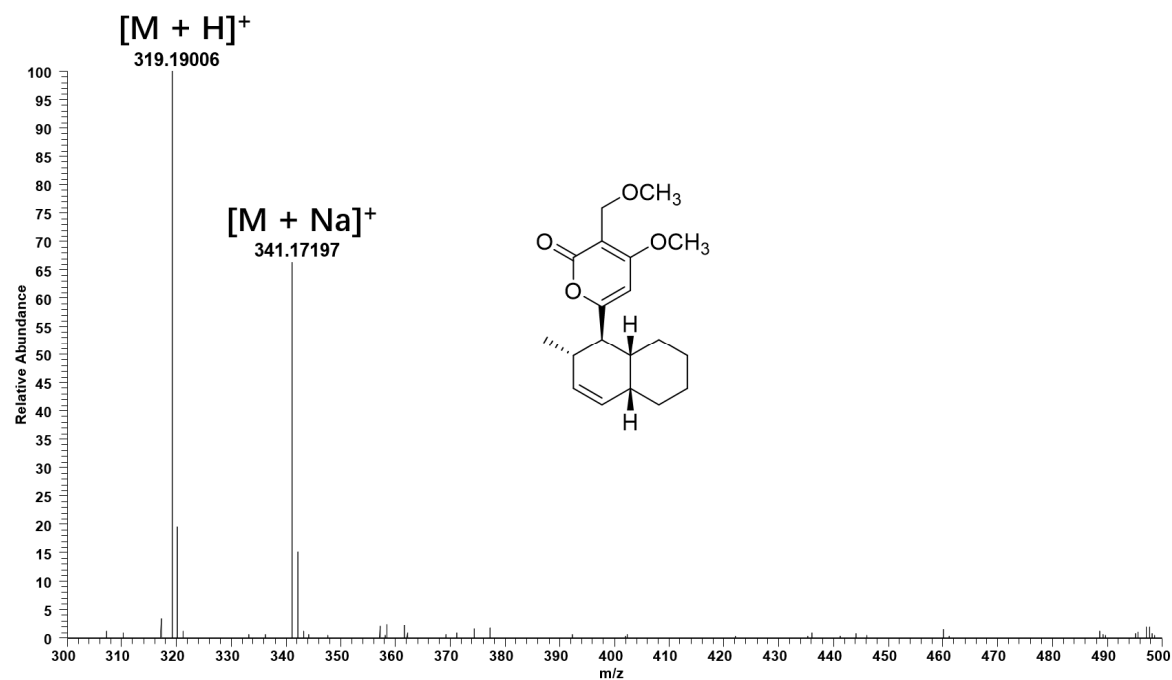

**Figure S2.**  $^1\text{H}$  NMR (500 MHz,  $\text{CD}_3\text{OD}$ ) spectrum of compound 1.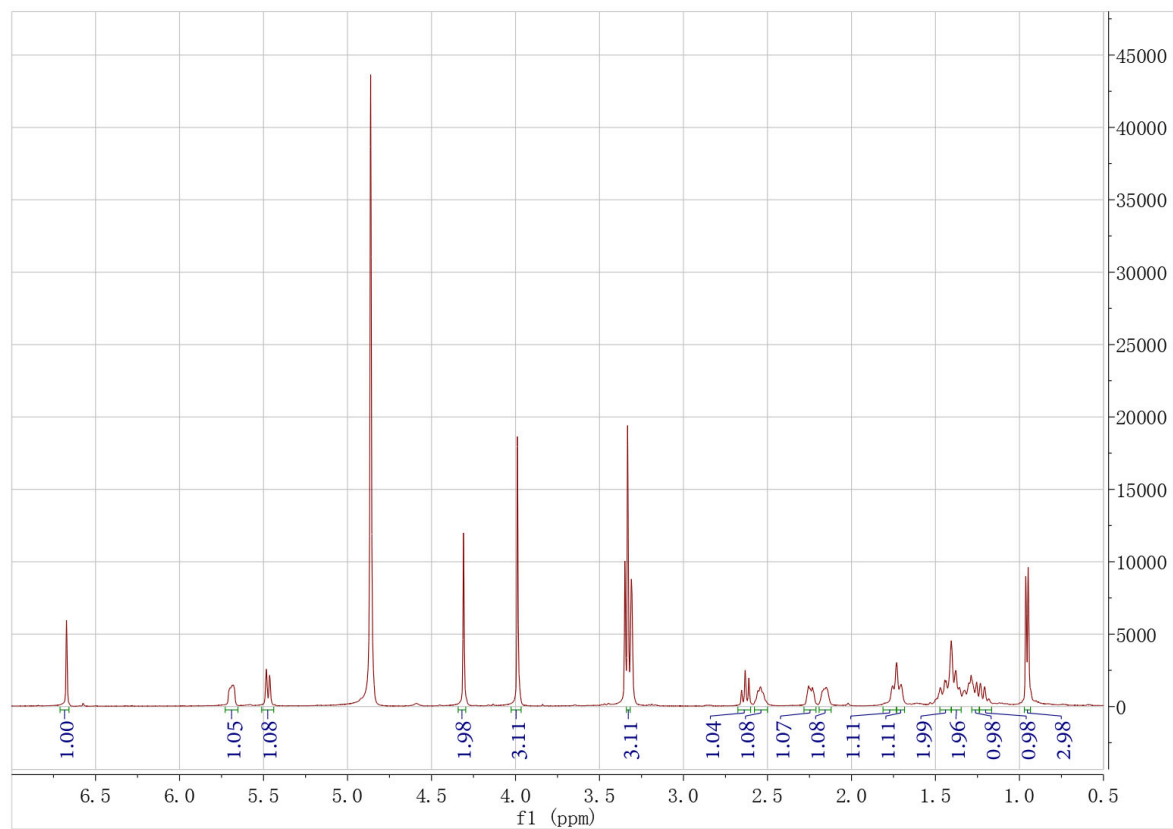**Figure S3.**  $^{13}\text{C}$  NMR spectrum of compound 1.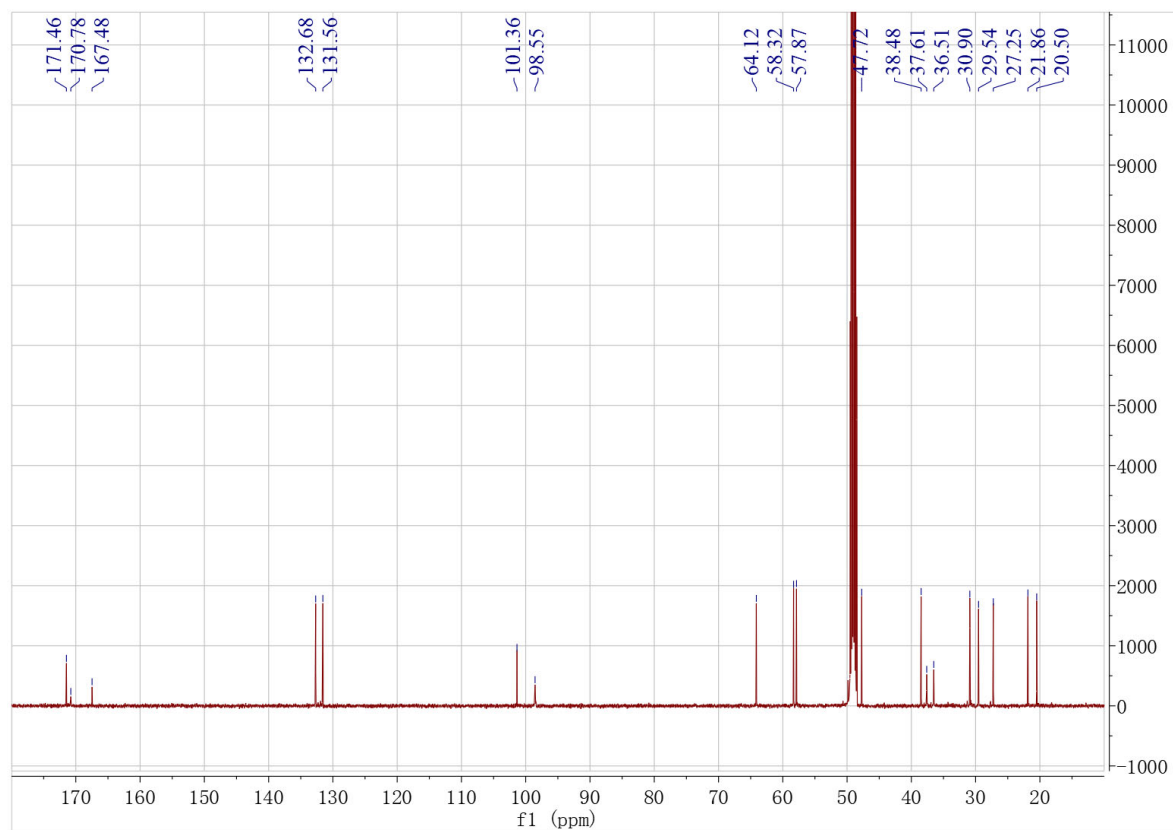

**Figure S4.** DEPT-135 spectrum of compound 1.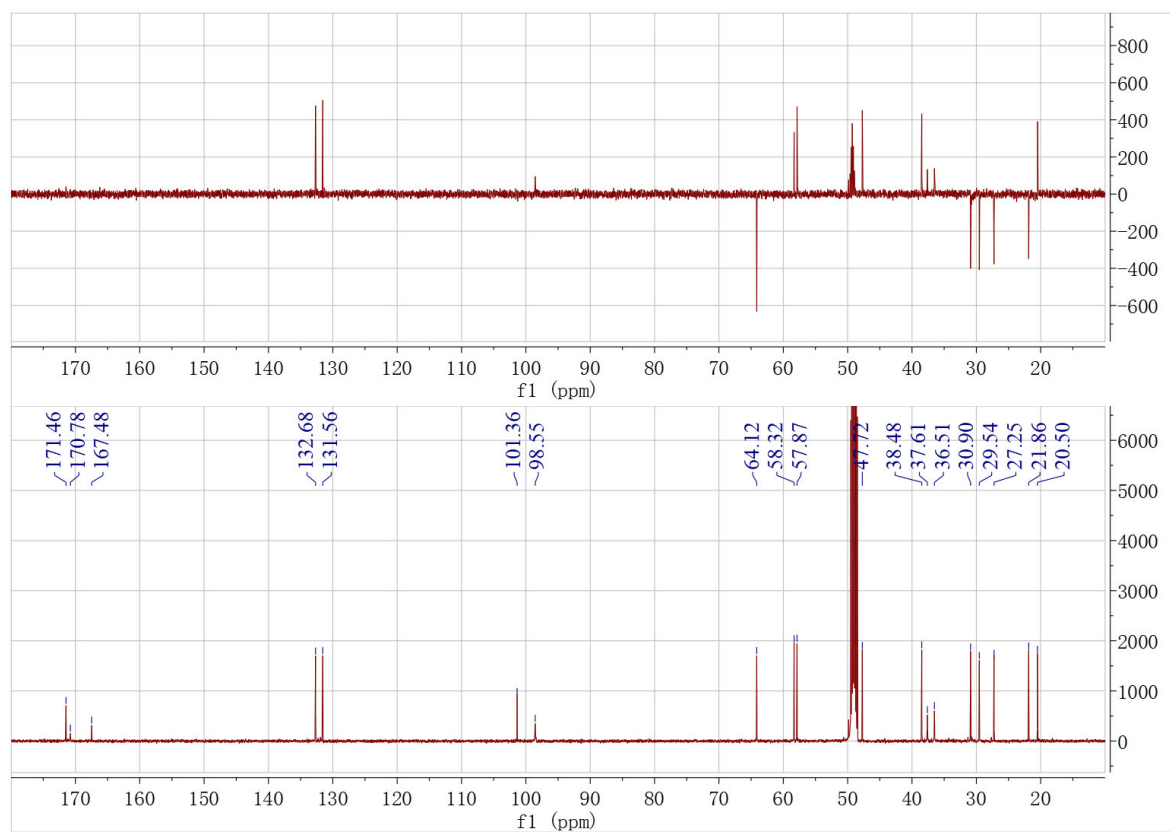**Figure S5.** HSQC spectrum of compound 1.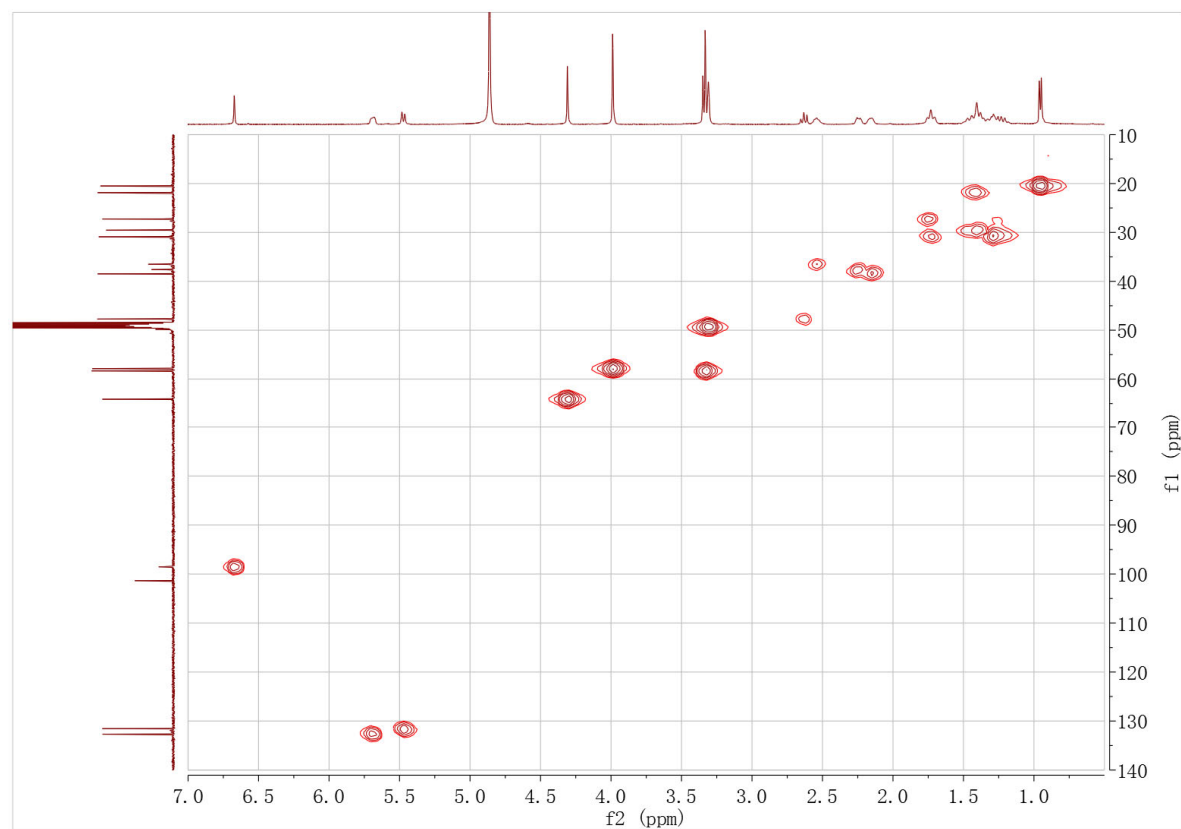

**Figure S6.**  $^1\text{H}$ - $^1\text{H}$  COSY spectrum of compound 1.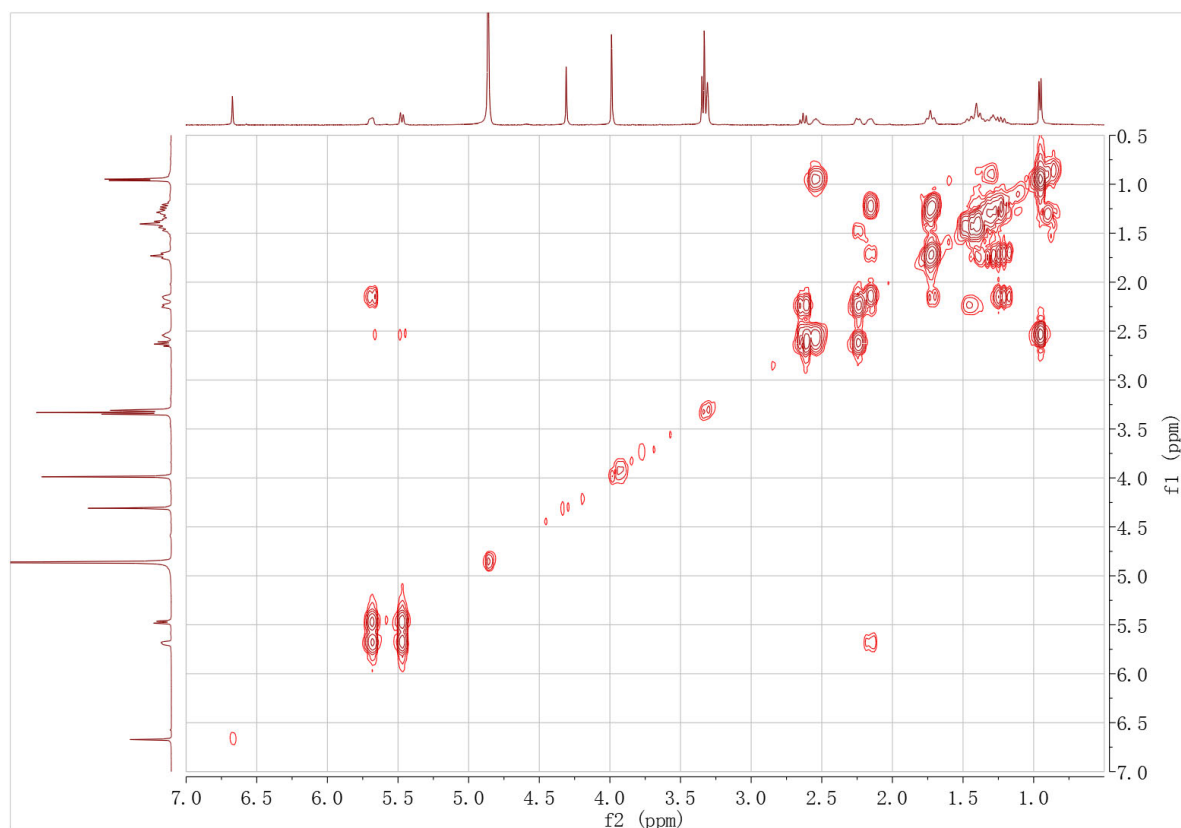**Figure S7.** HMBC spectrum of compound 1.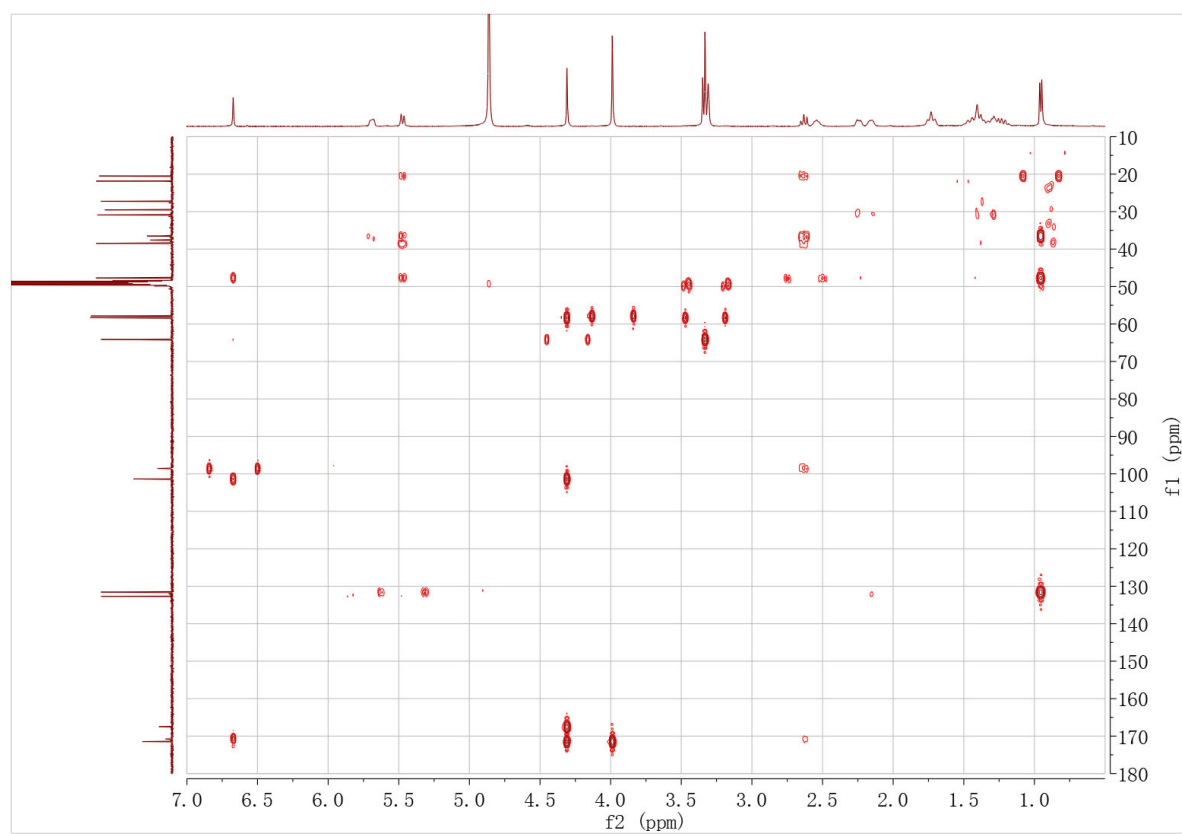

**Figure S8.** NOESY spectrum of compound 1.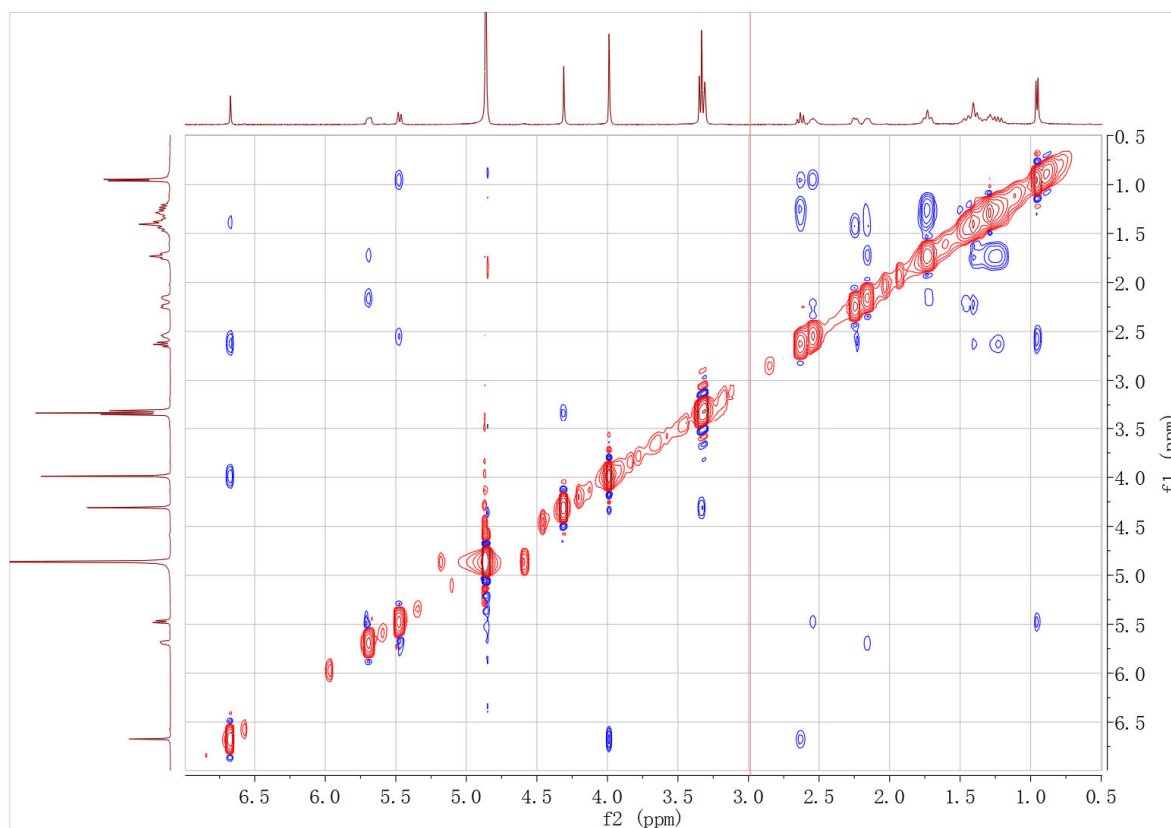

**Figure S9.** HRESIMS spectrum of compound 3.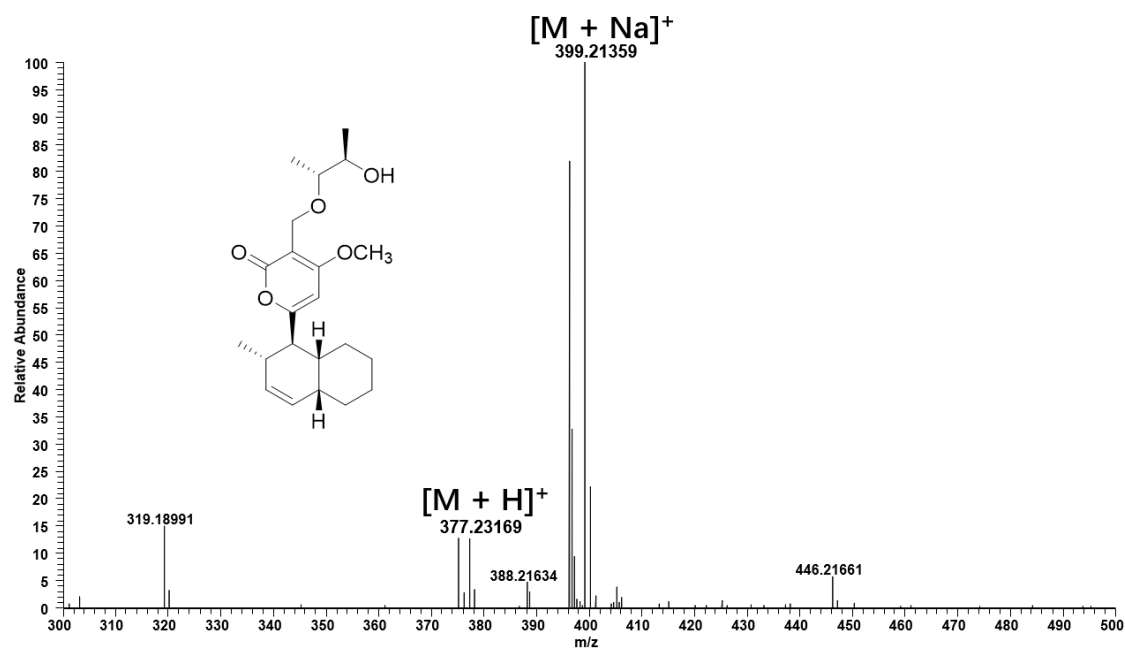

**Figure S10.**  $^1\text{H}$  NMR (500 MHz, MeOD) spectrum of compound 3.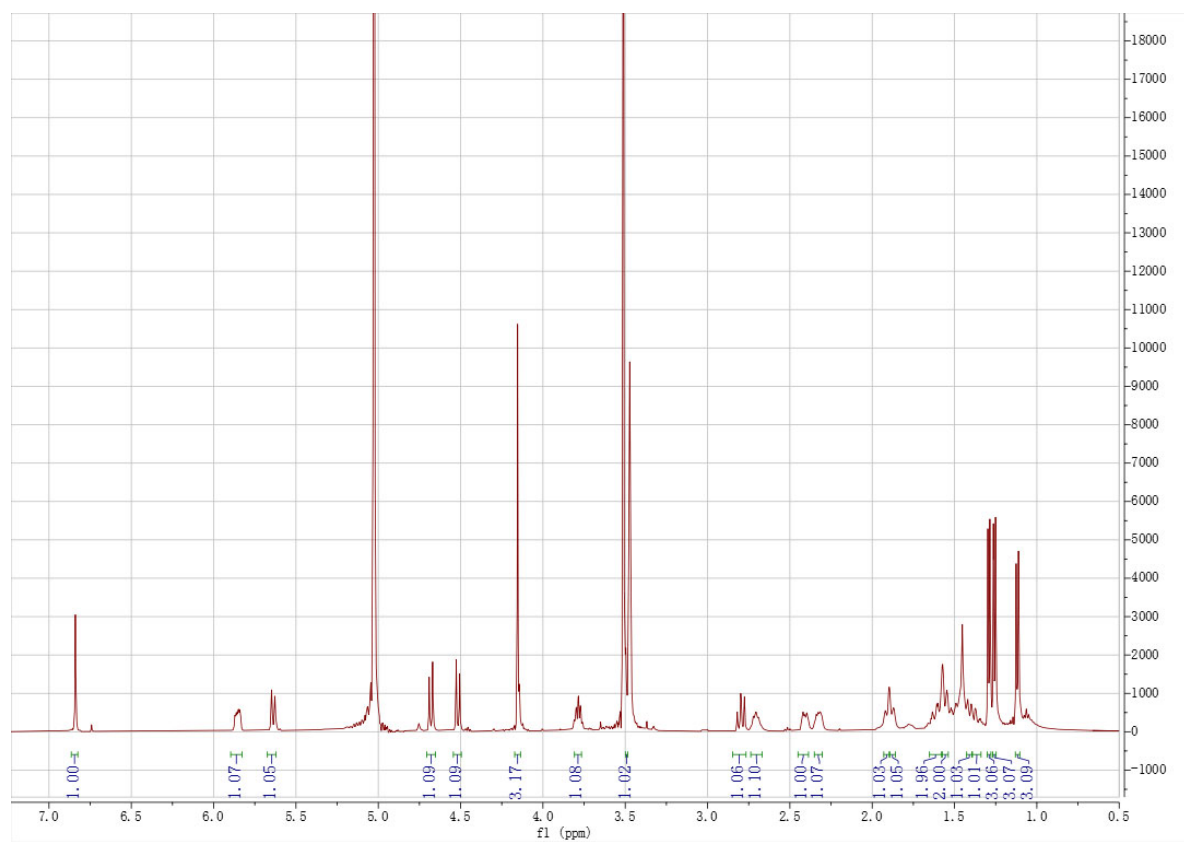**Figure S11.**  $^{13}\text{C}$  NMR spectrum of compound 3.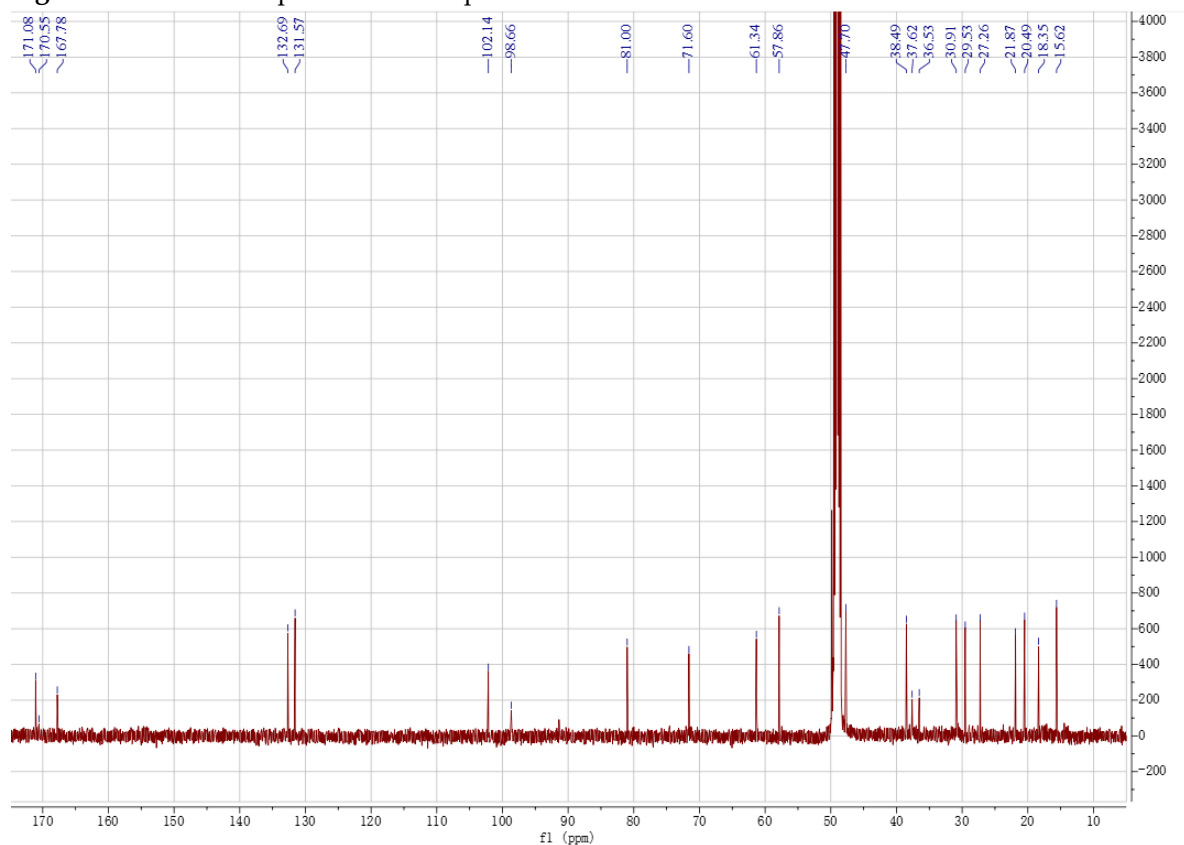



**Figure S12.** DEPT-135 spectrum of compound 3.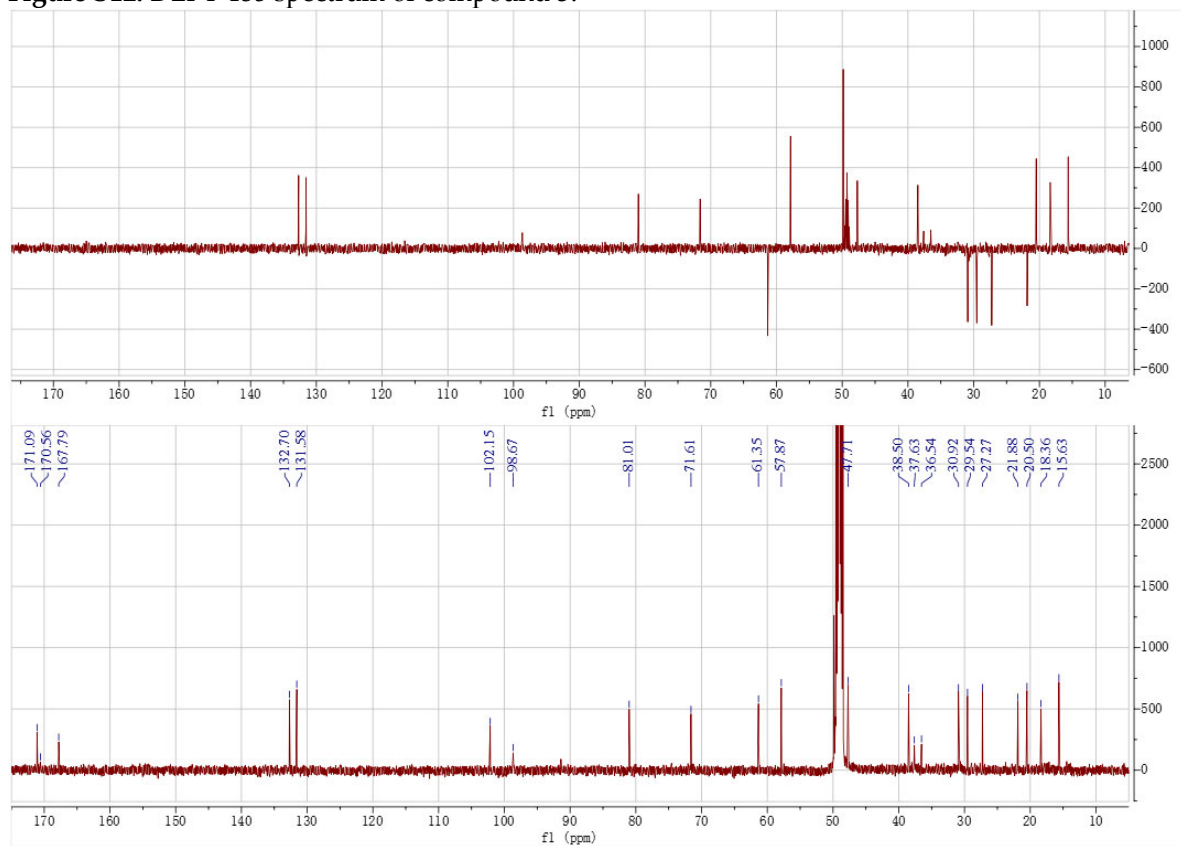**Figure S13.** HSQC spectrum of compound 3.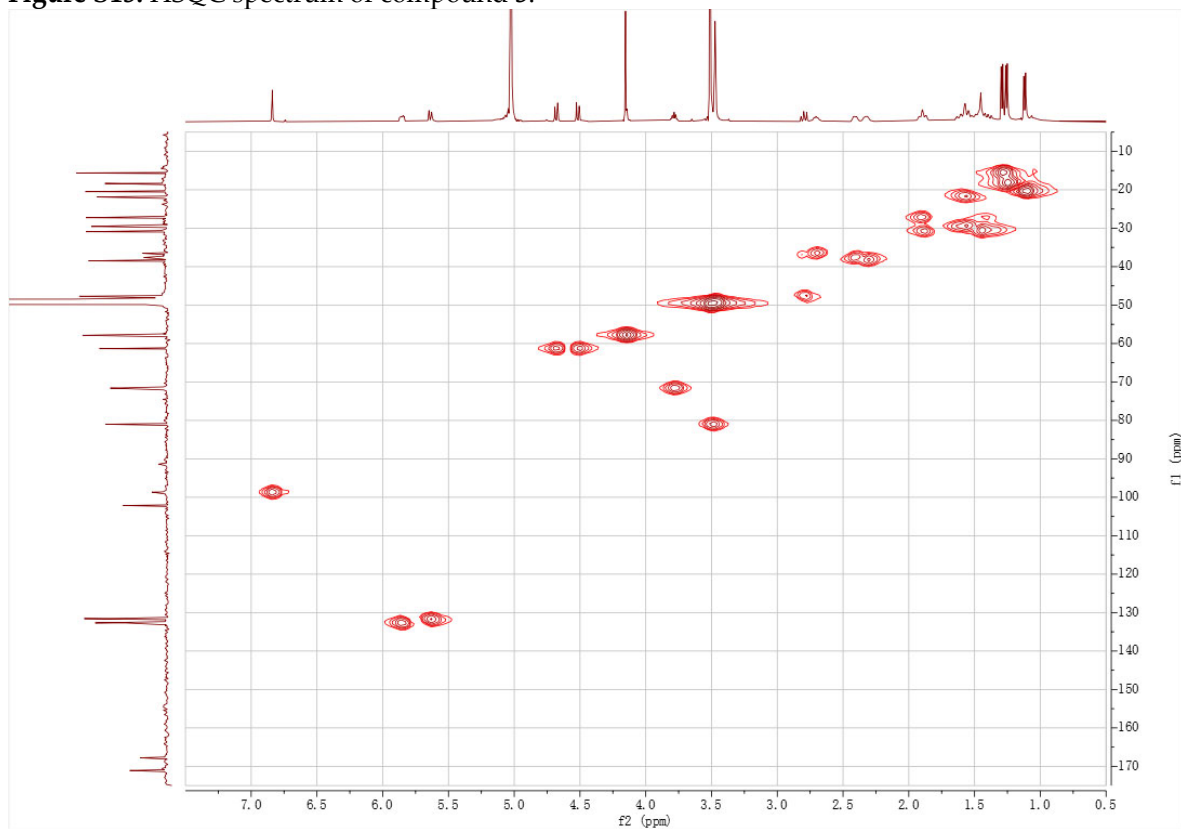

**Figure S14.**  $^1\text{H}$ - $^1\text{H}$  COSY spectrum of compound 3.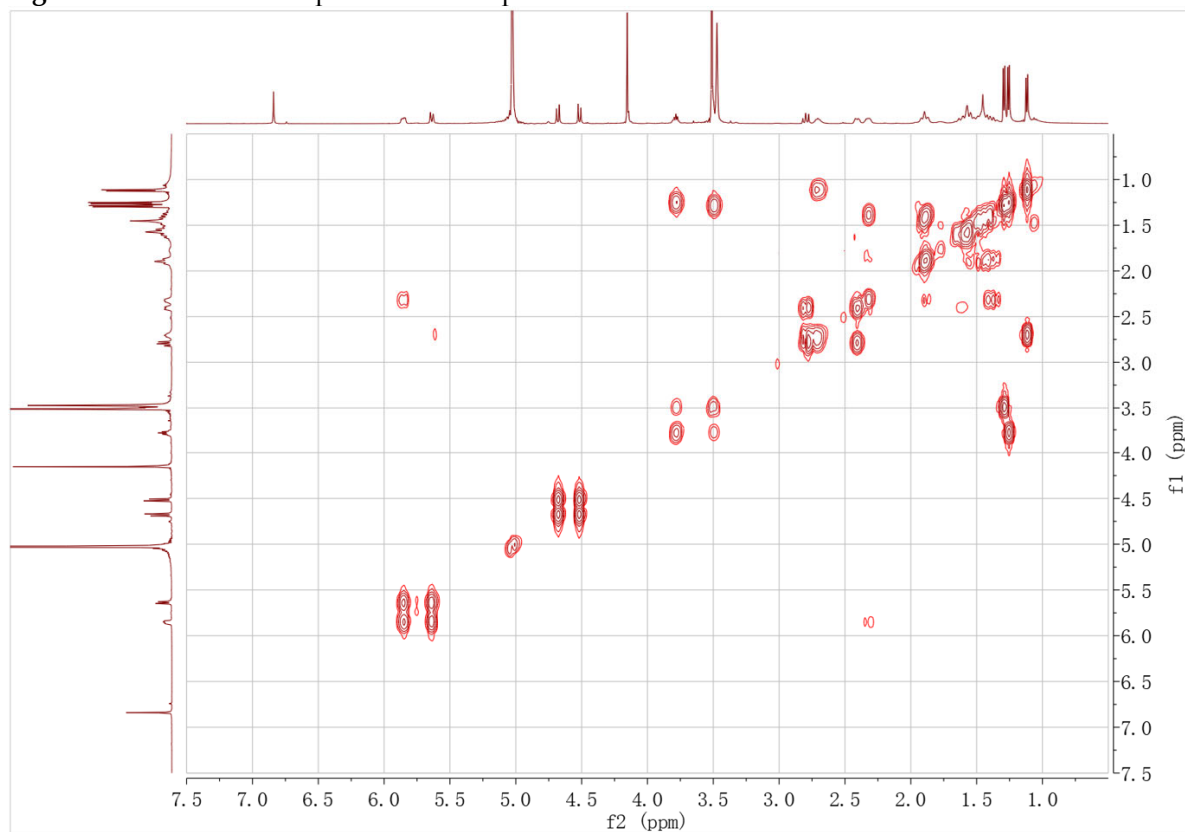**Figure S15.** HMBC spectrum of compound 3.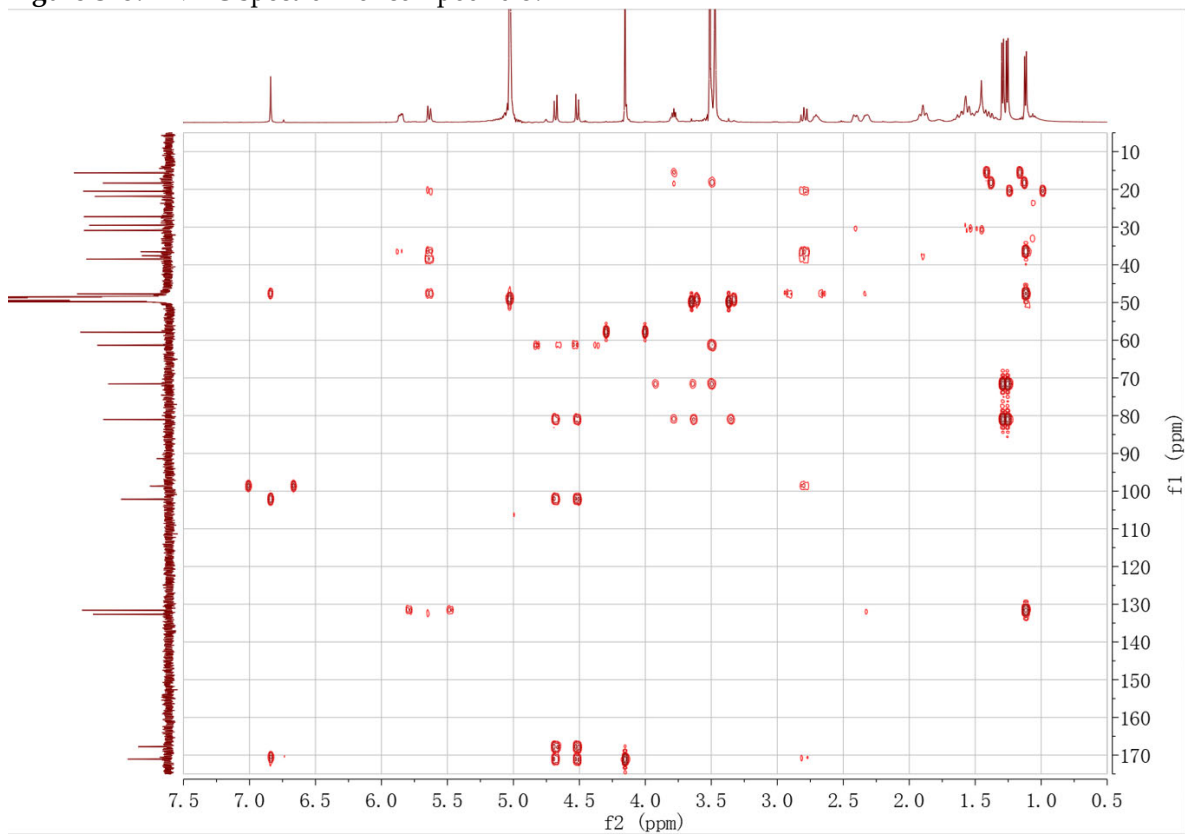

**Figure S16.** NOESY spectrum of compound 3.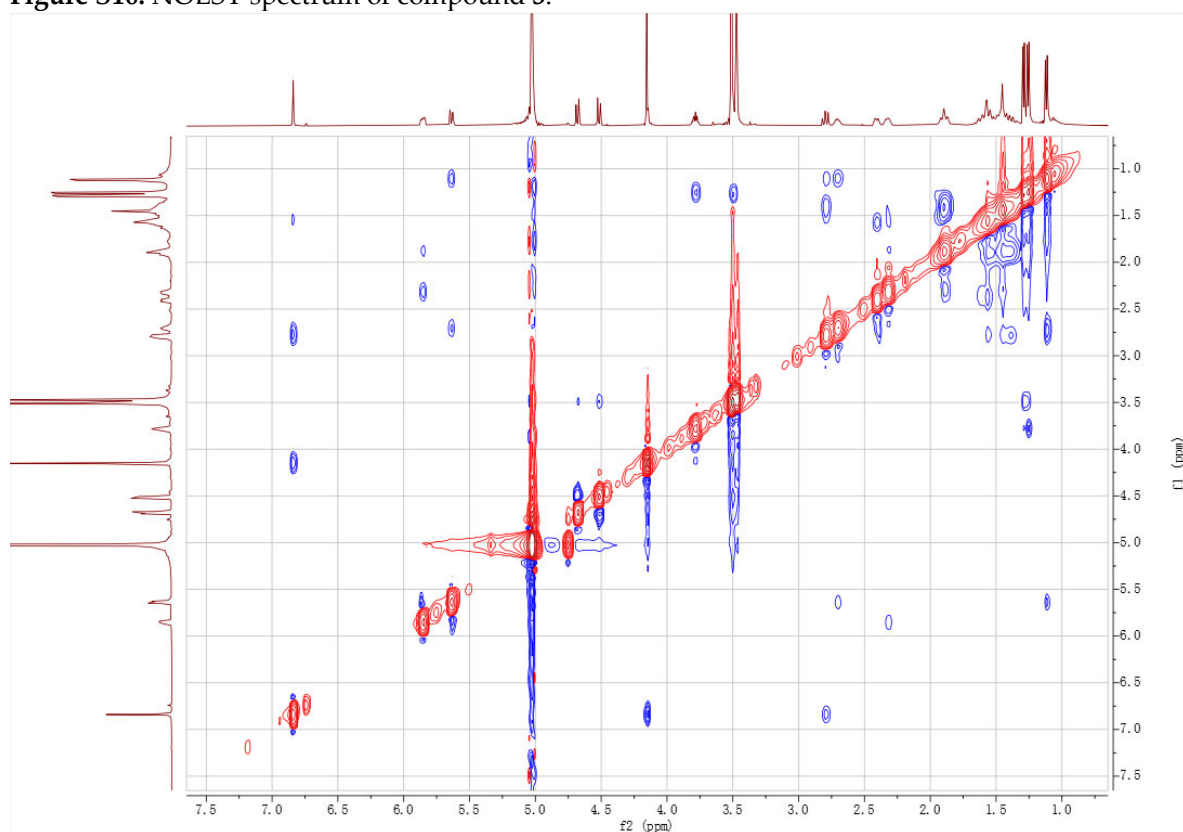

**Figure S17.** HRESIMS spectrum of compound 5.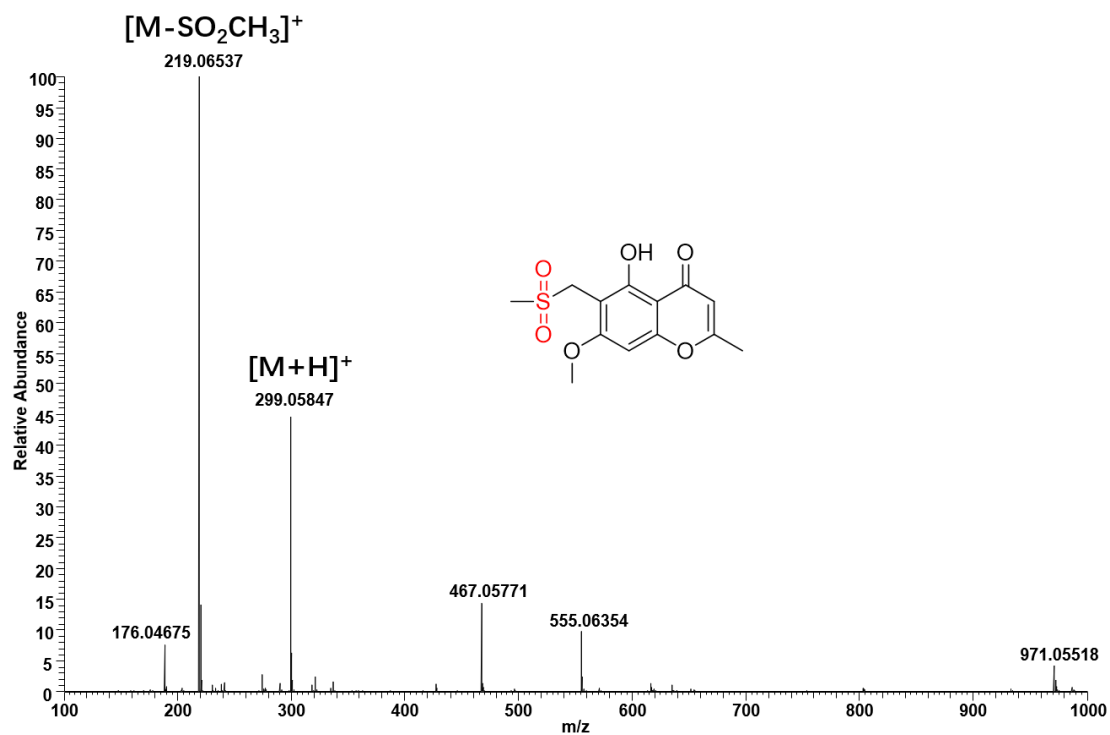

**Figure S18.**  $^1\text{H}$  NMR (500 MHz,  $\text{CDCl}_3$ ) spectrum of compound 5.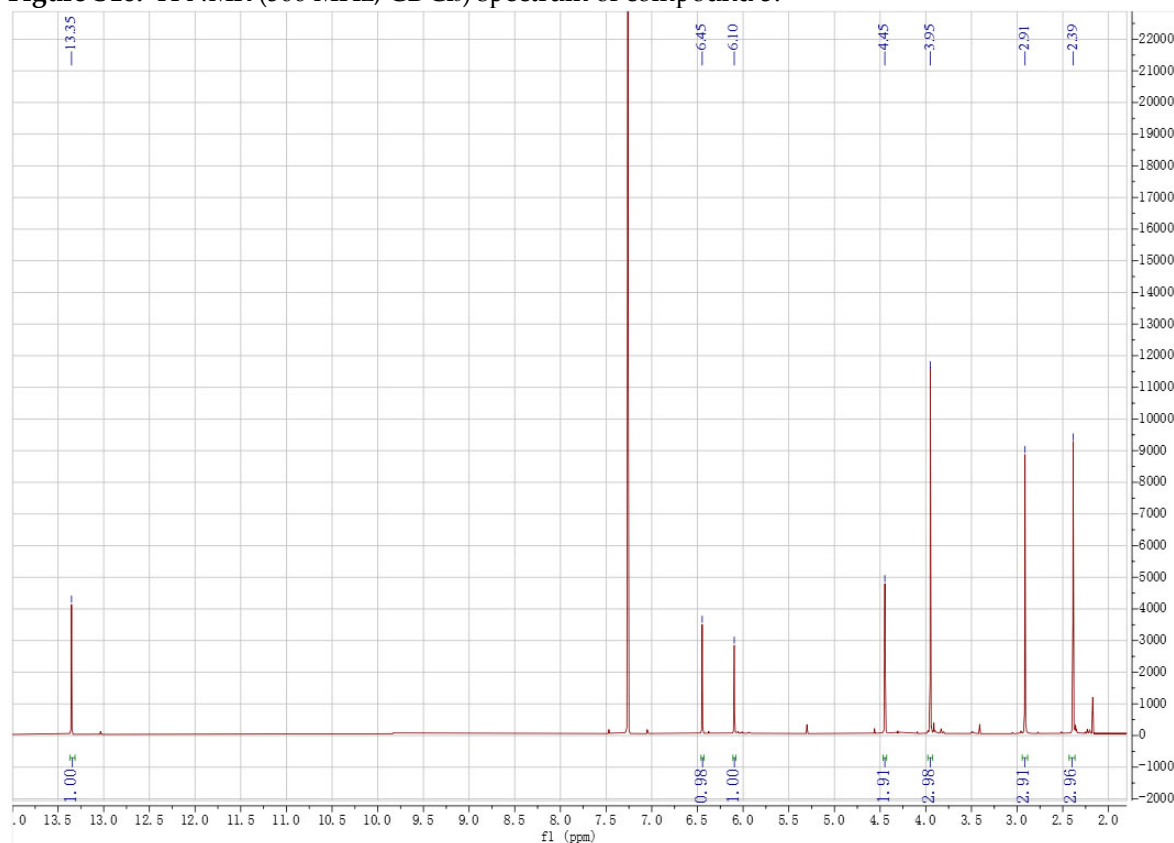**Figure S19.**  $^{13}\text{C}$  NMR spectrum of compound 5.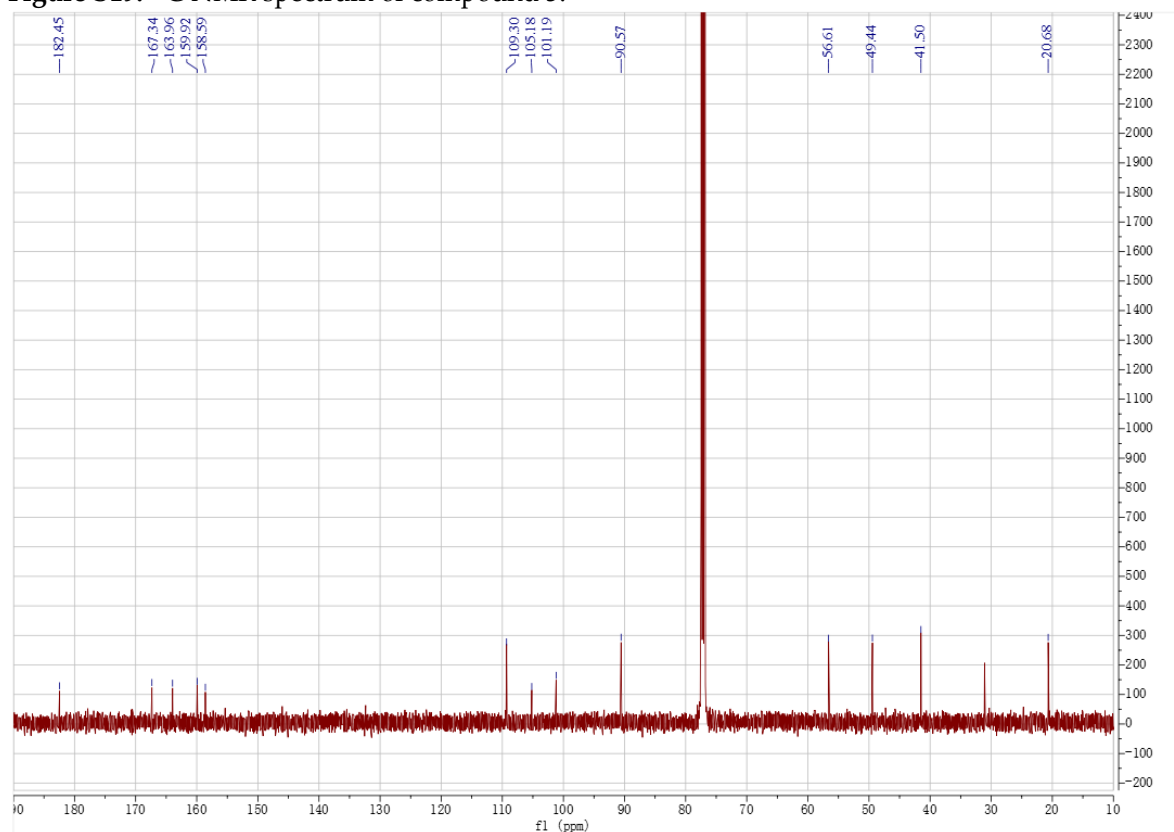**Figure S20.** DEPT-135 spectrum of compound 5.

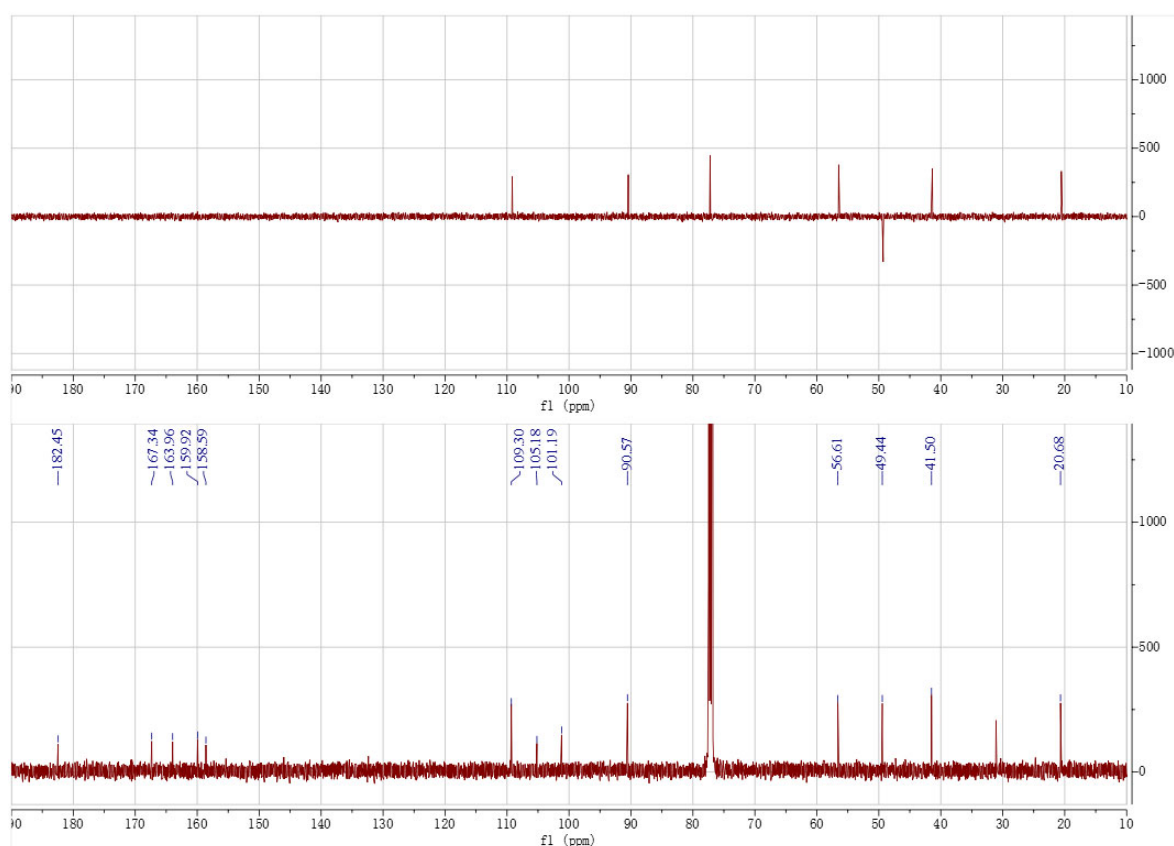

Figure S21. HSQC spectrum of compound 5.

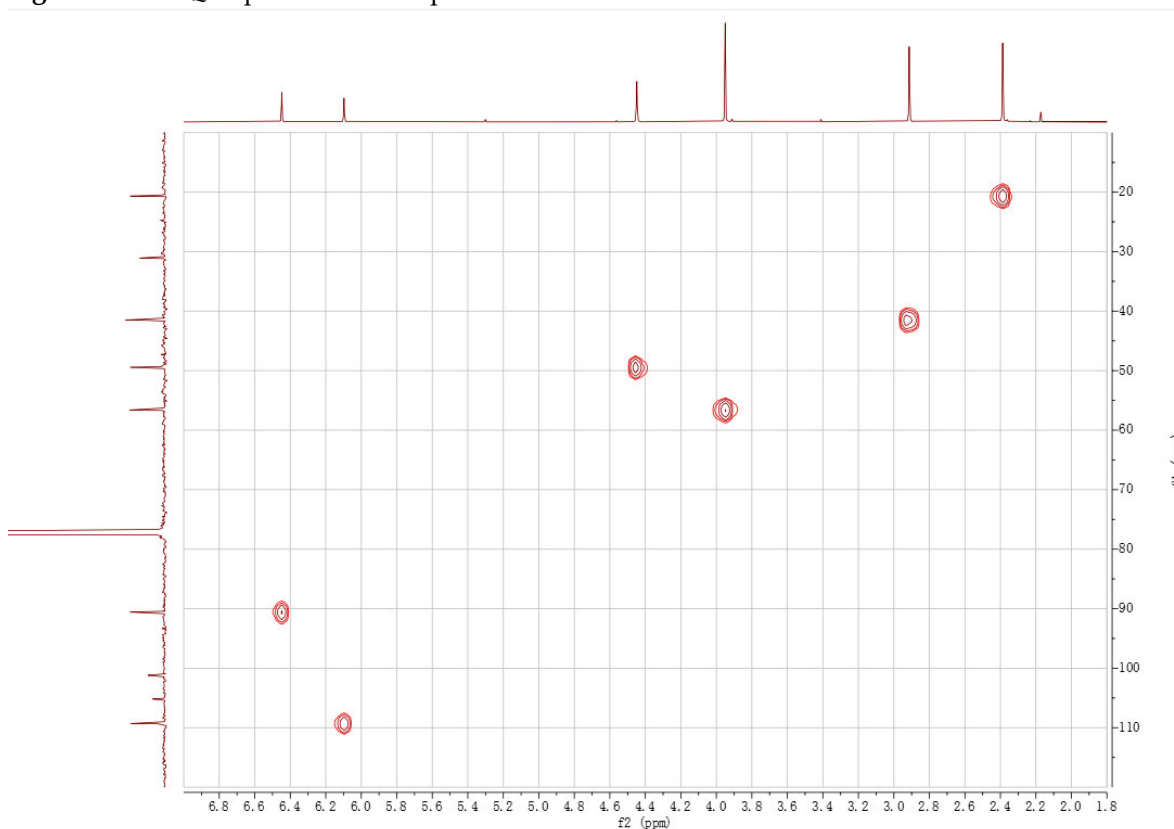

Figure S22. HMBC spectrum of compound 5.

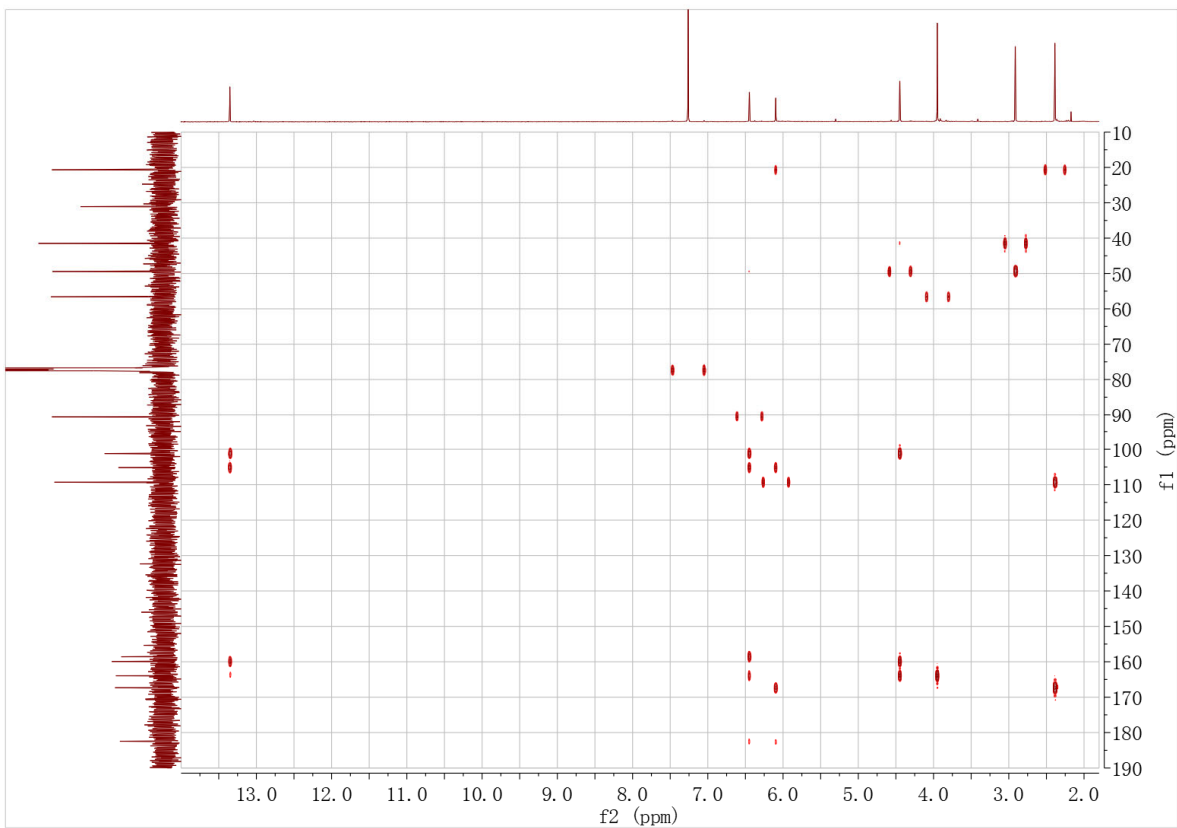

**Figure S23.** HRESIMS spectrum of compound 6.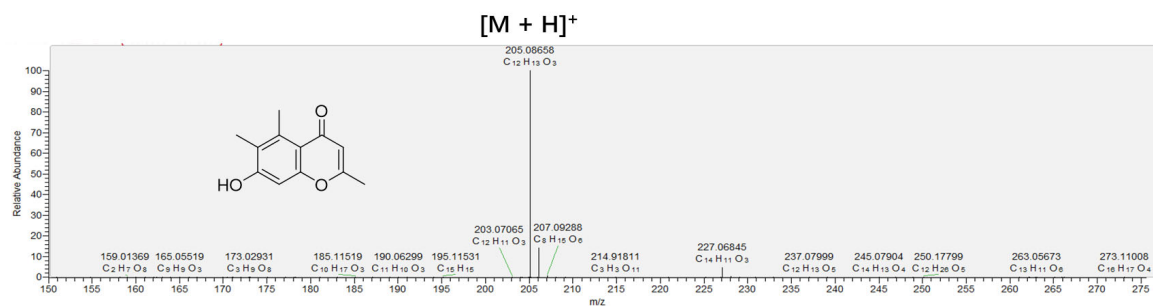



**Figure S24.**  $^1\text{H}$  NMR (500 MHz, MeOD) spectrum of compound 6.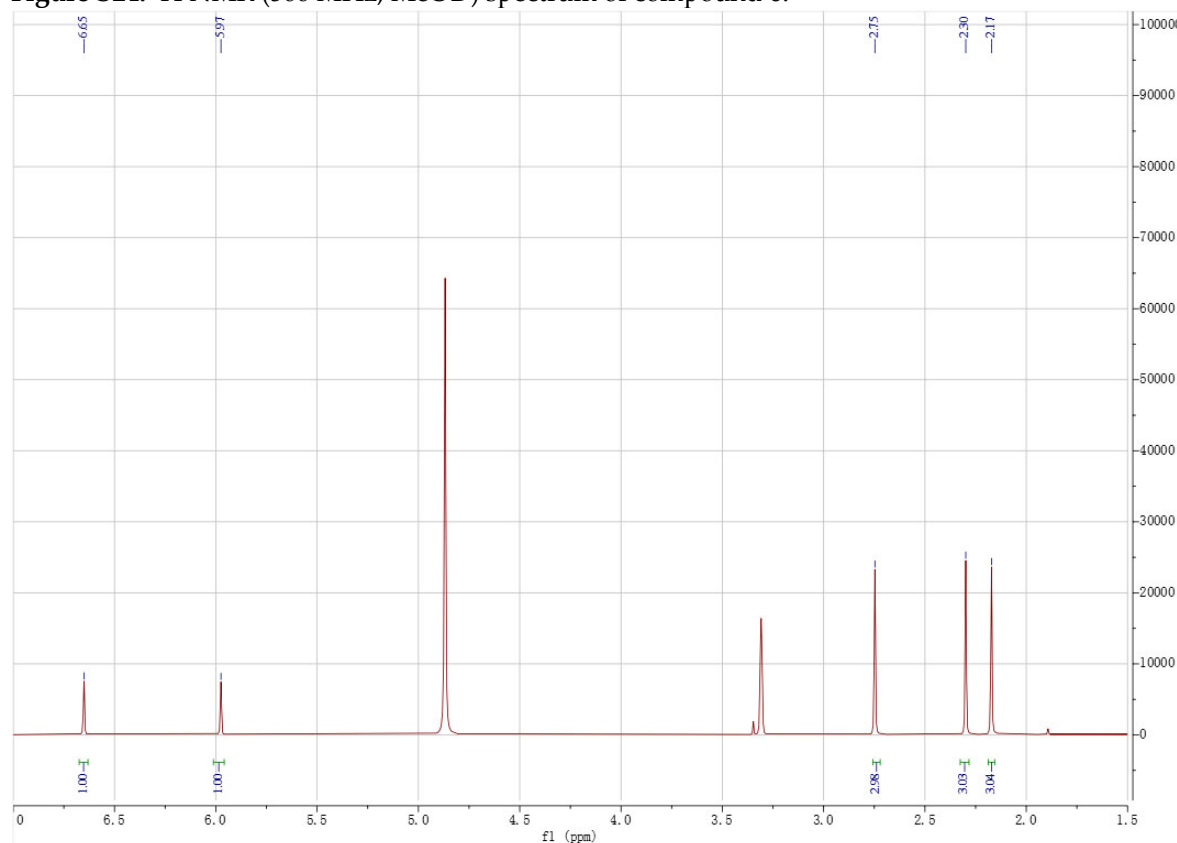**Figure S25.**  $^{13}\text{C}$  NMR spectrum of compound 6.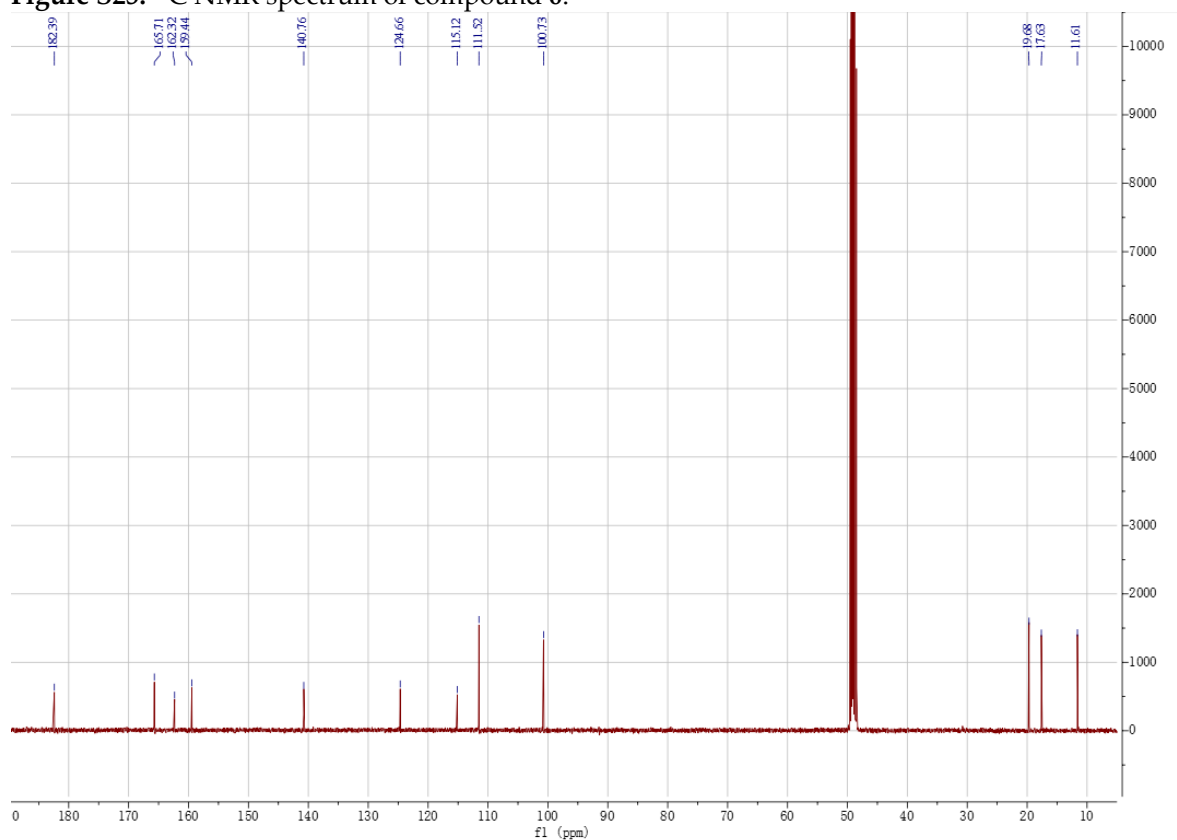**Figure S26.** HSQC spectrum of compound 6.

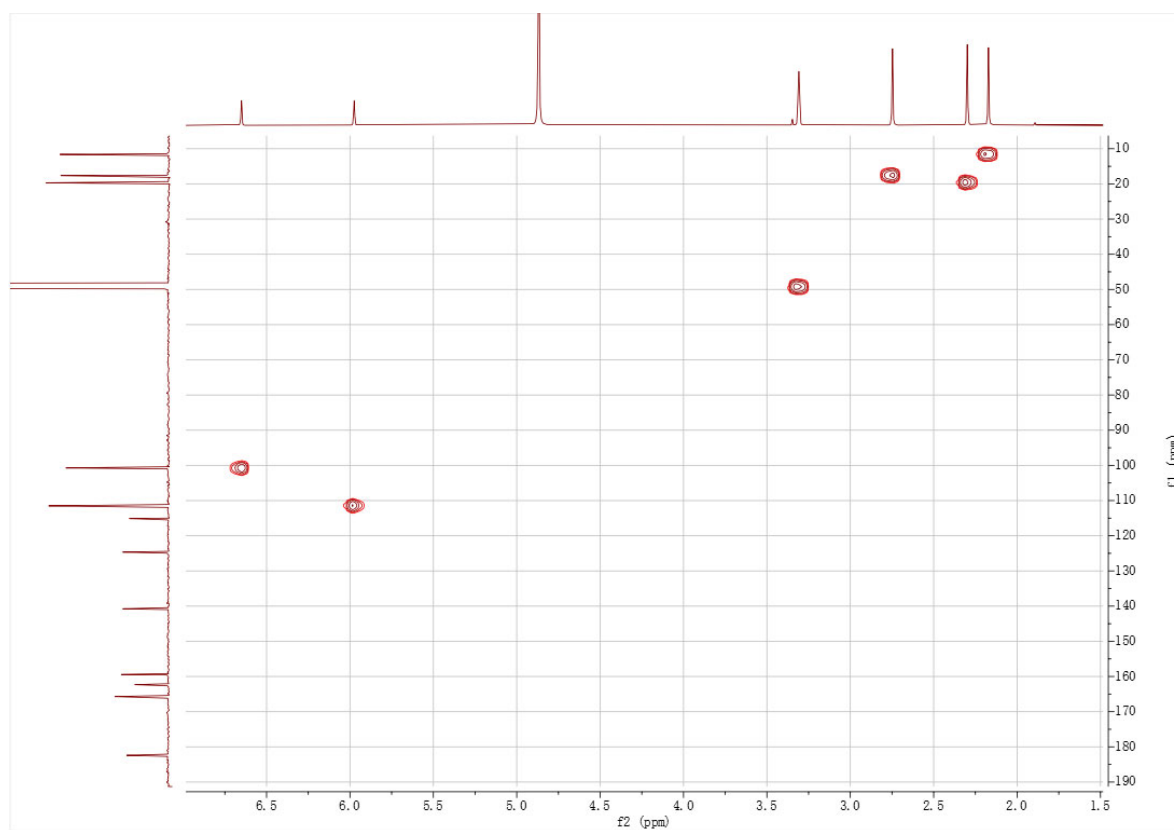

Figure S27. HMBC spectrum of compound 6.

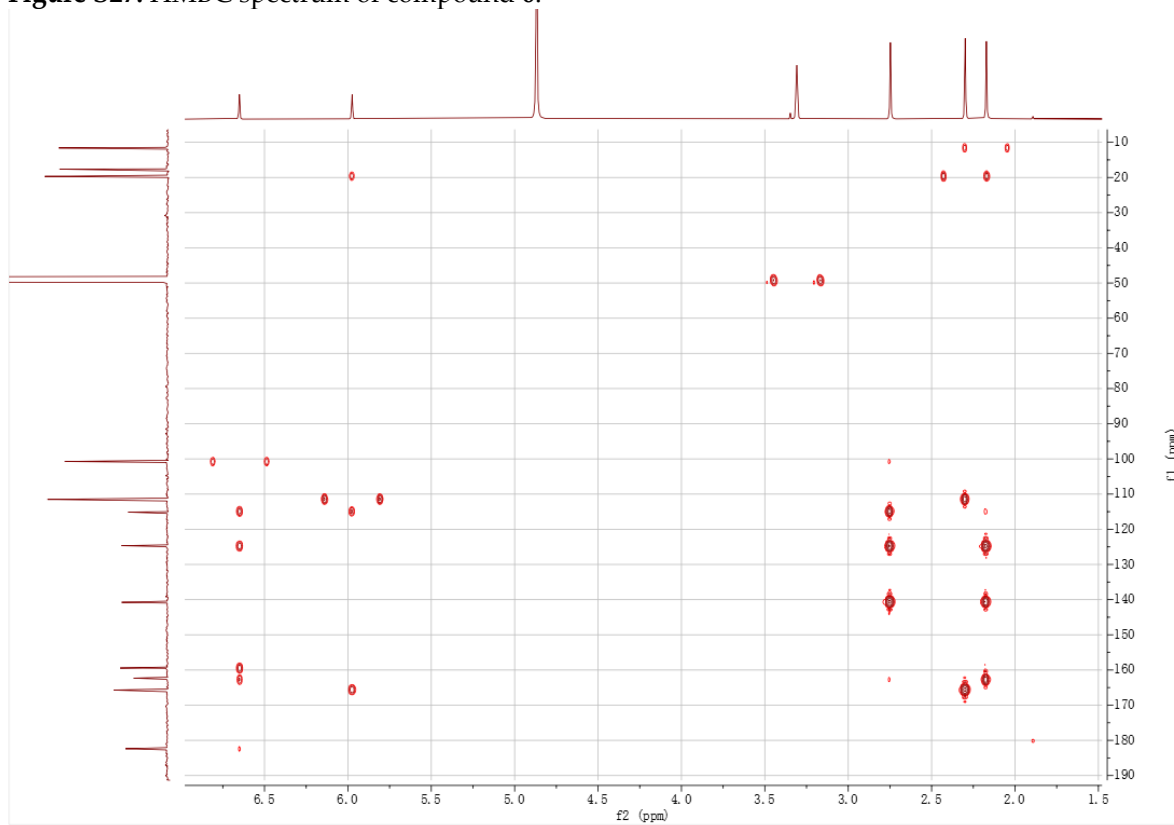

**Figure S28.** HRESIMS spectrum of compound 8.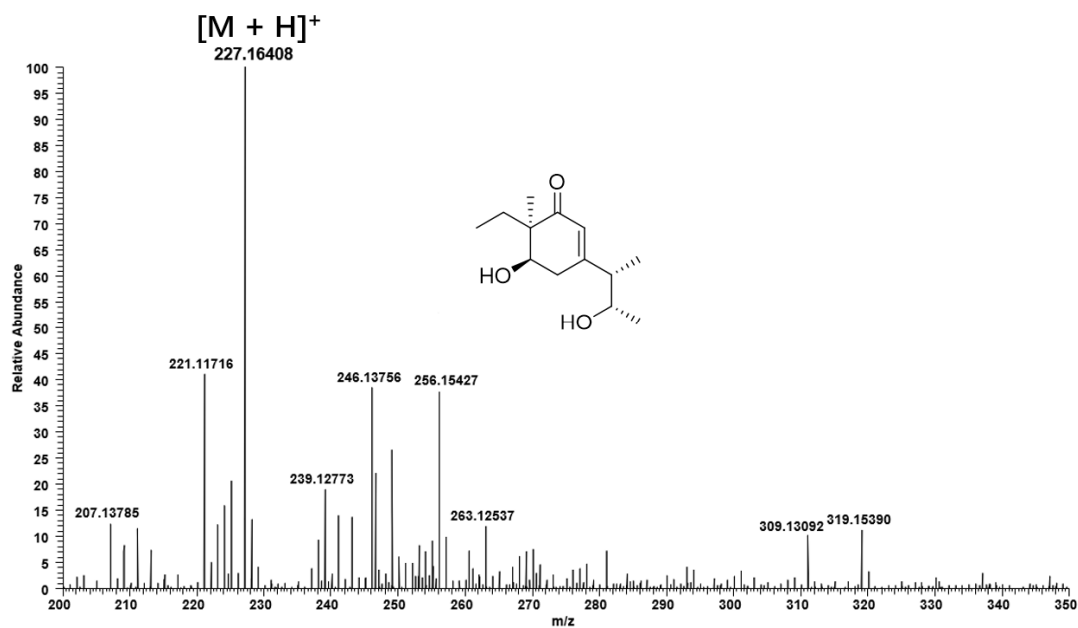

**Figure S29.**  $^1\text{H}$  NMR (500 MHz,  $\text{CDCl}_3$ ) spectrum of compound 8.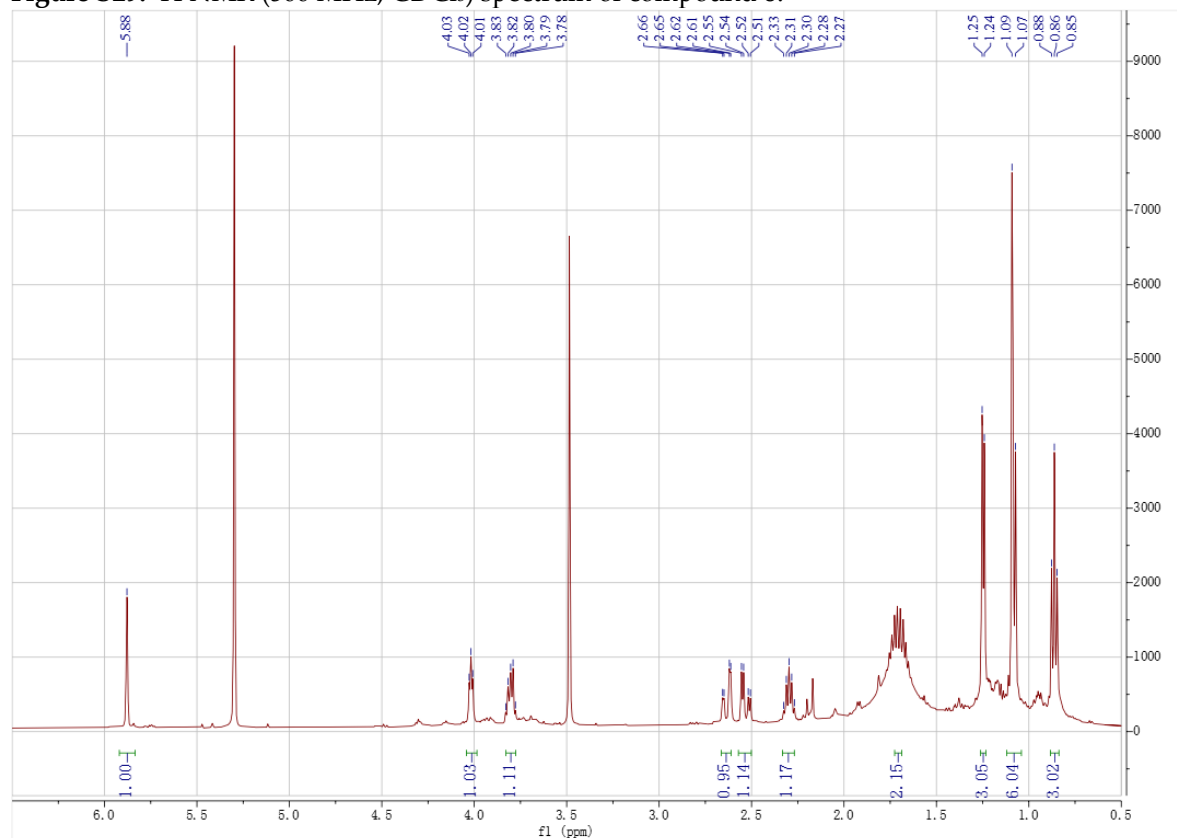**Figure S30.**  $^{13}\text{C}$  NMR spectrum of compound 8.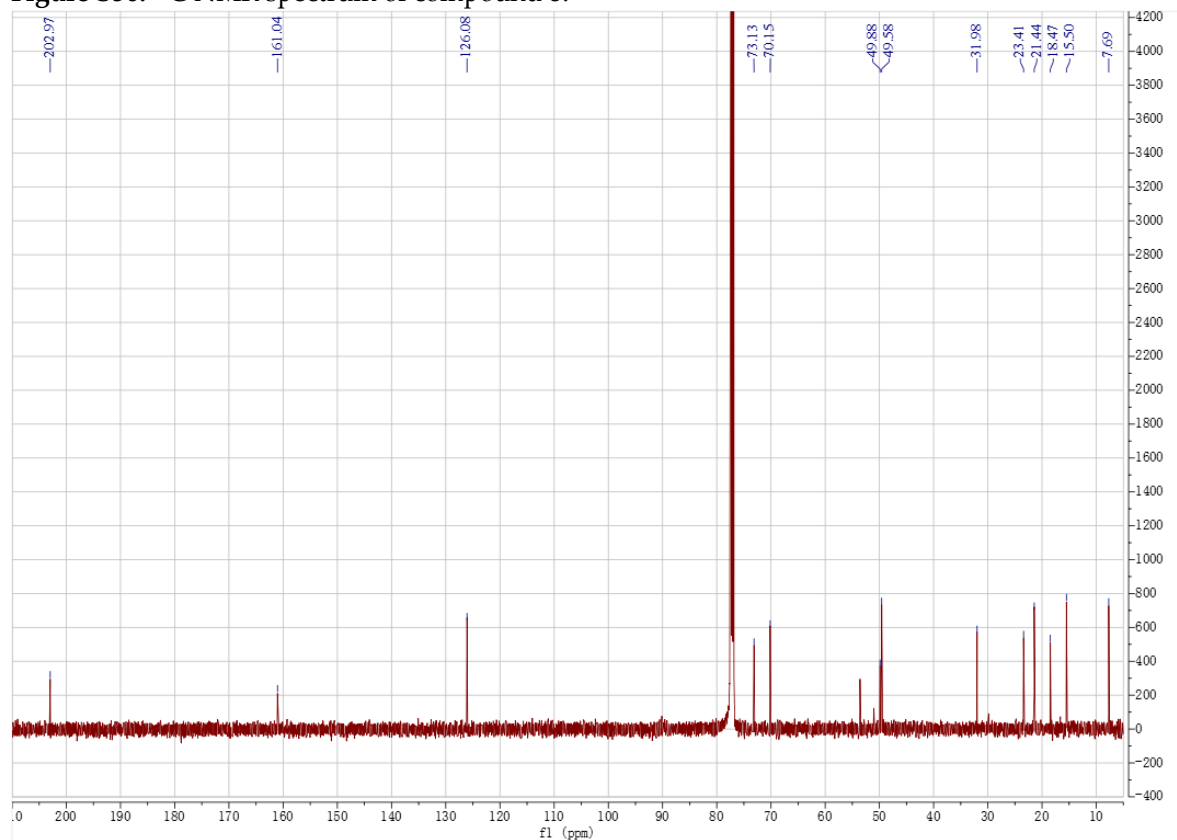**Figure S31.** DEPT-135 spectrum of compound 8.

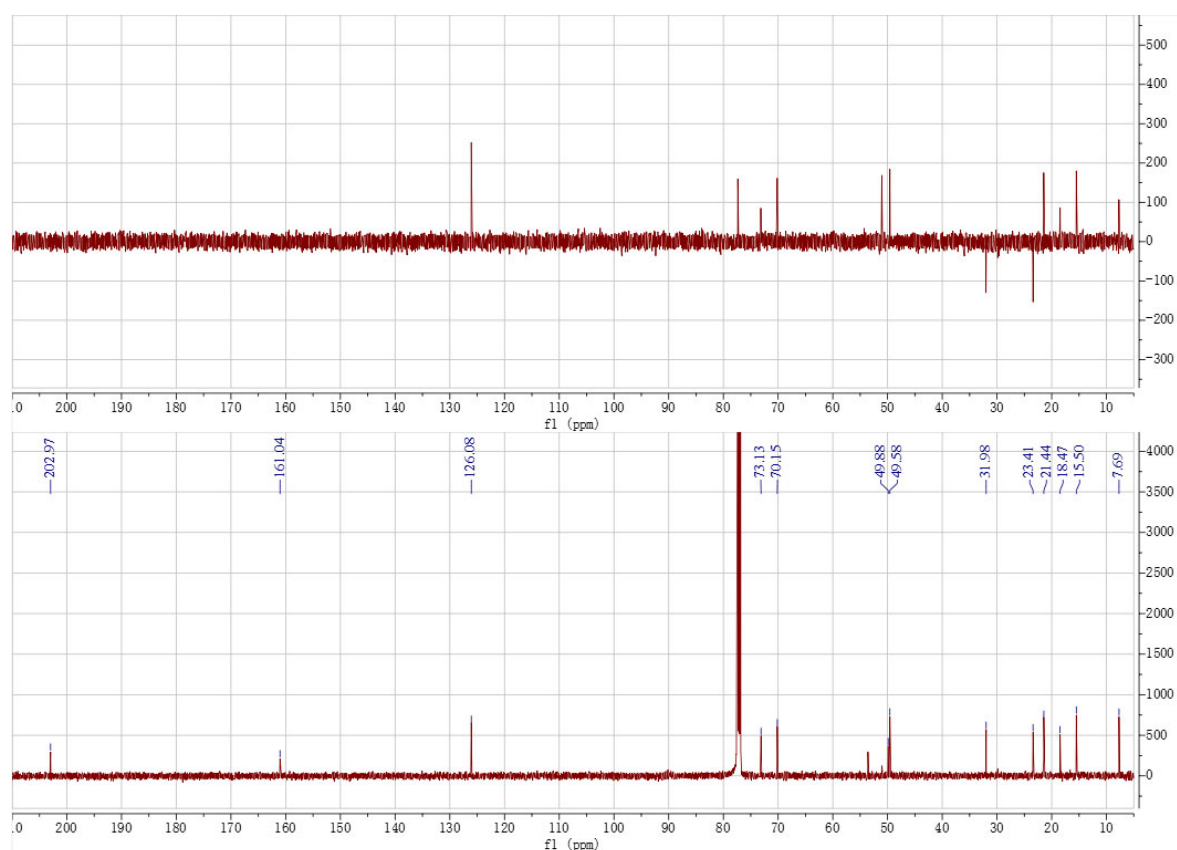

Figure S32. HSQC spectrum of compound 8.

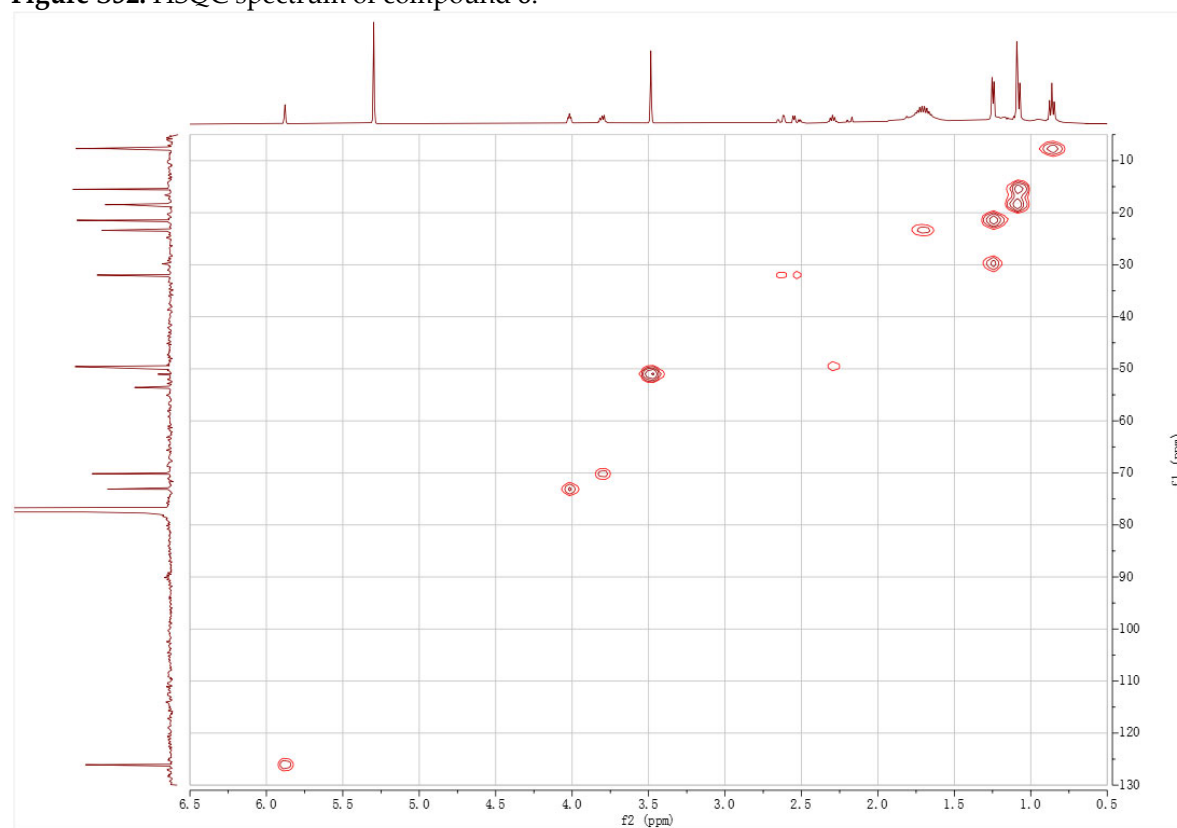

Figure S33.  $^1\text{H}$ - $^1\text{H}$  COSY spectrum of compound 8.

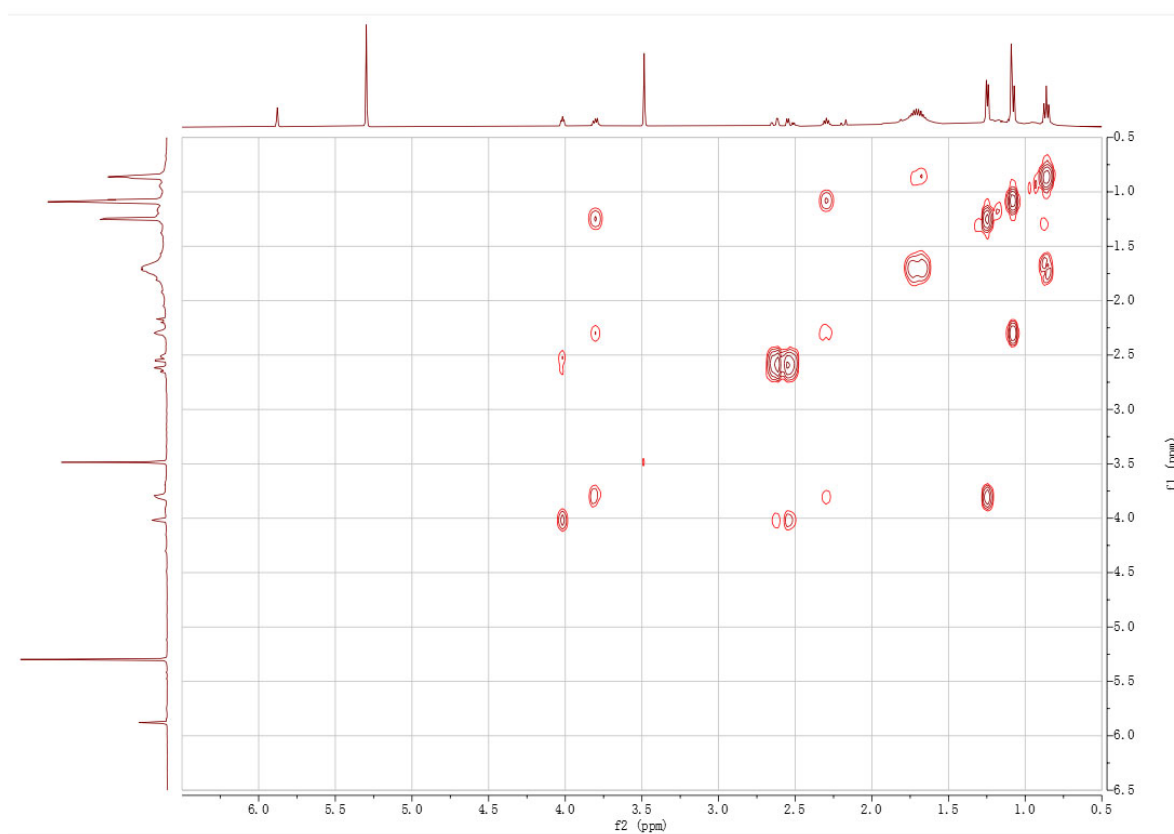

Figure S34. HMBC spectrum of compound 8.

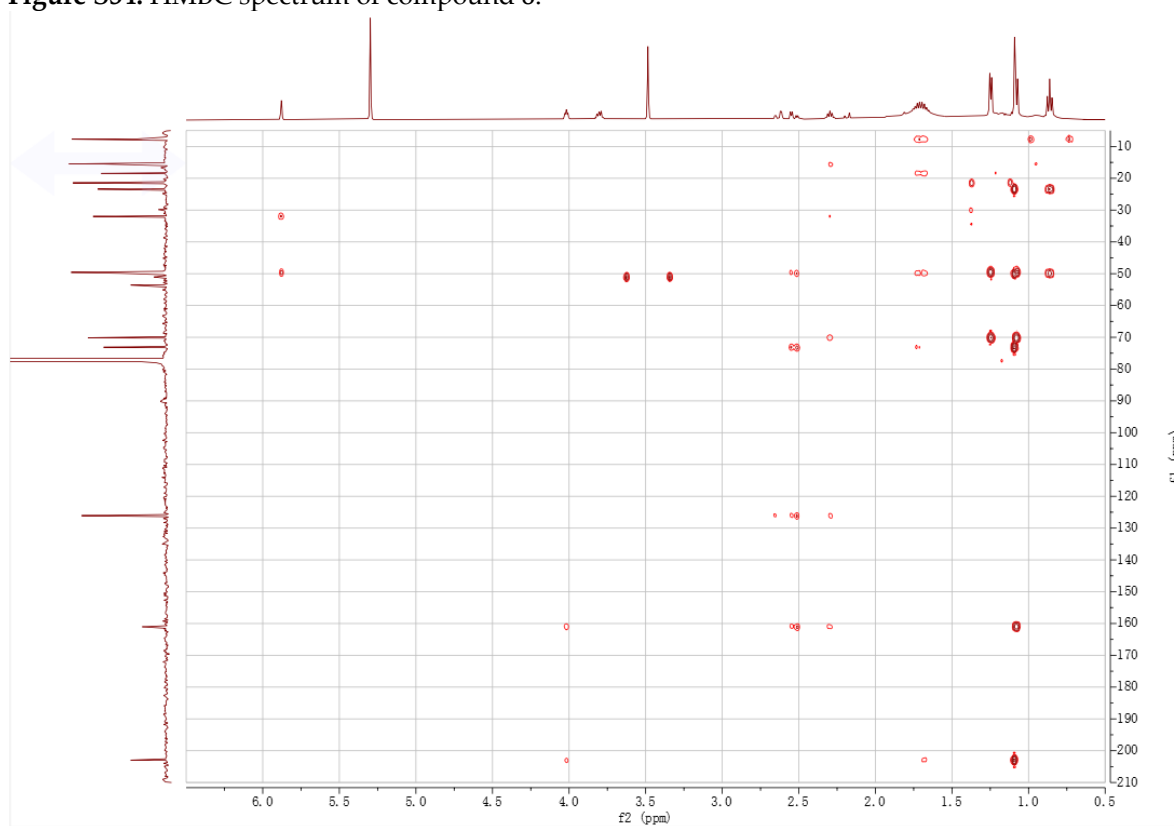

Figure S35. NOESY spectrum of compound 8.

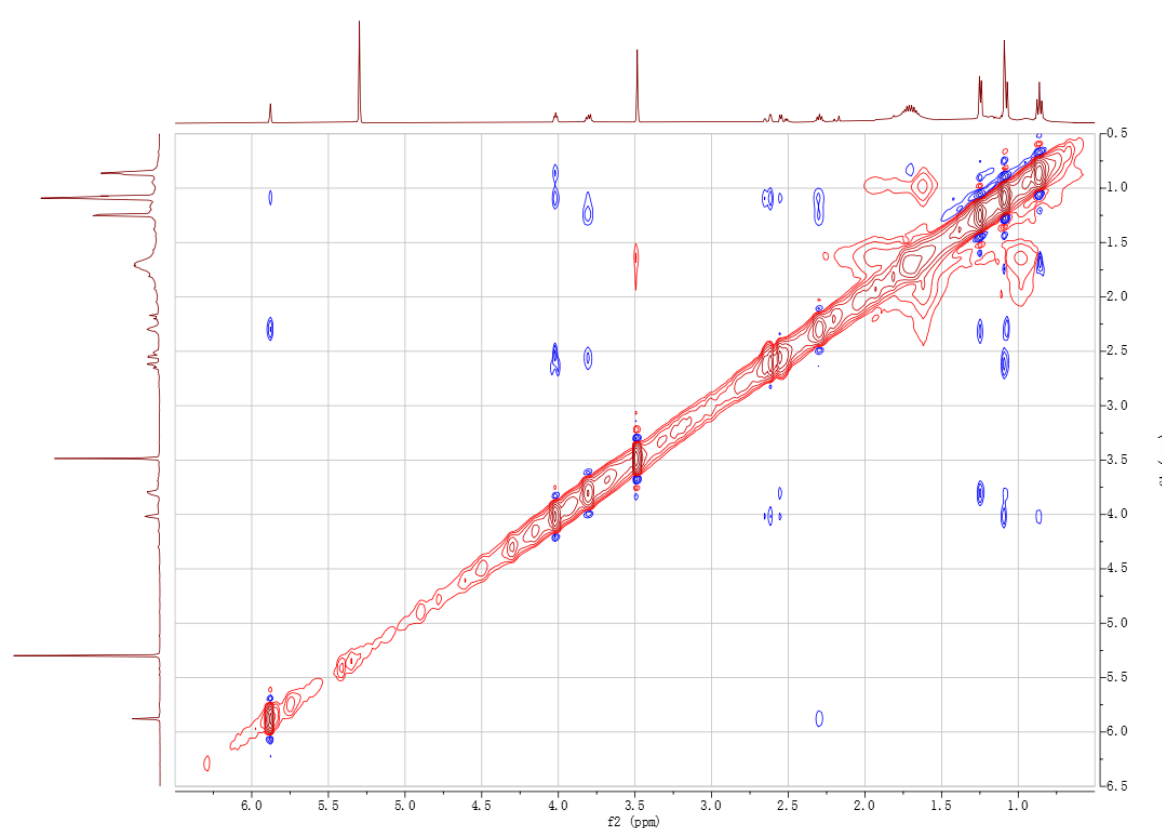

**Figure S36.** Optimized geometries of predominant conformers (weighting factors) for compound **1** at the B3LYP/6-311++g(d, p) level above 1% population.

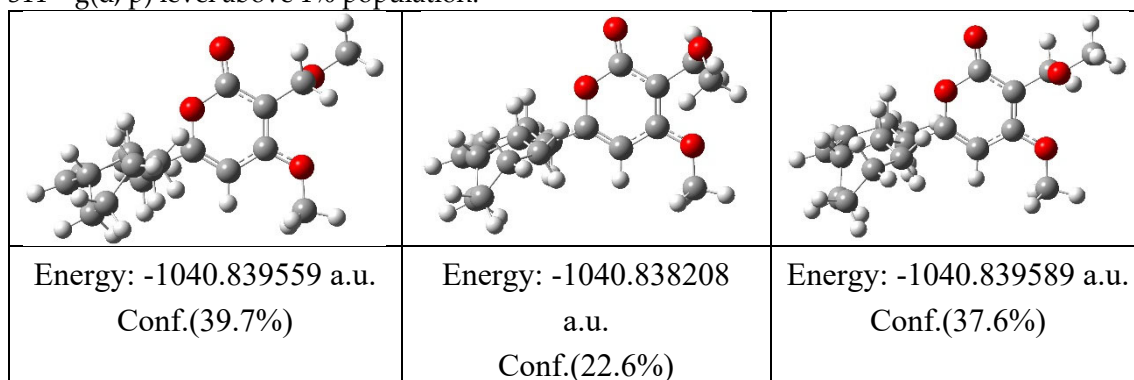

**Figure S37.** Optimized geometries of predominant conformers (weighting factors) for compound **3** at the B3LYP/6-311++g(d, p) level above 1% population.

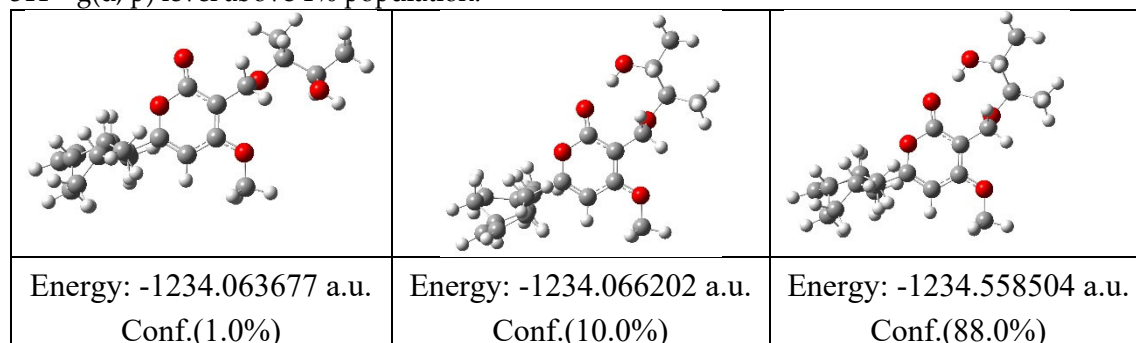

**Figure S38.** Optimized geometries of predominant conformers (weighting factors) for compound **8** at the B3LYP/6-311++g(d, p) level above 1% population.

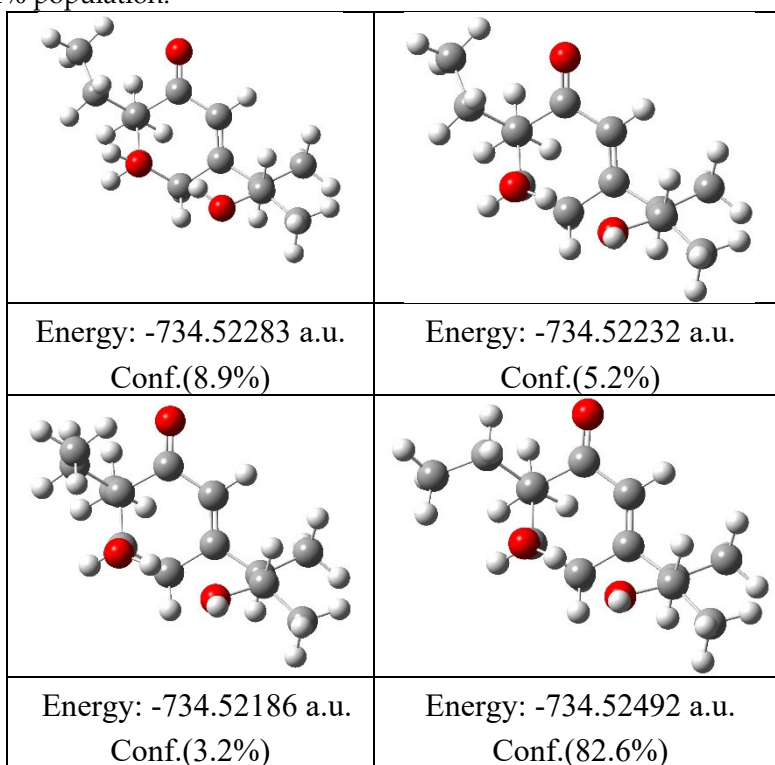

**Figure S39.** Regression analyses of experimental versus calculated  $^{13}\text{C}$  NMR chemical shifts of compounds **1**, **3** and **8**.

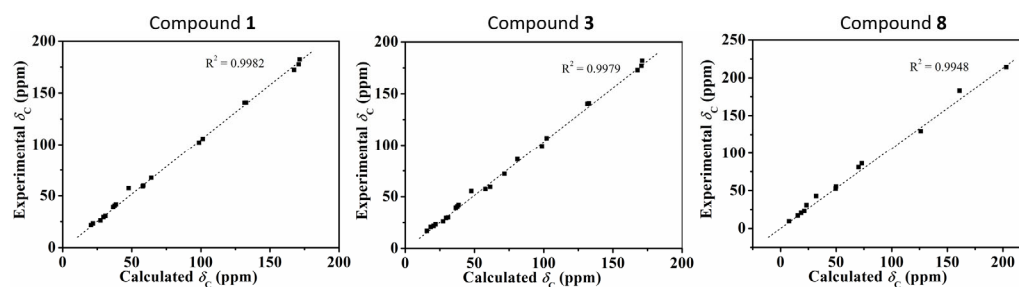



Figure S40. Herbicidal potential of **9** against the radicle growth of *Digitaria sanguinalis* seedlings.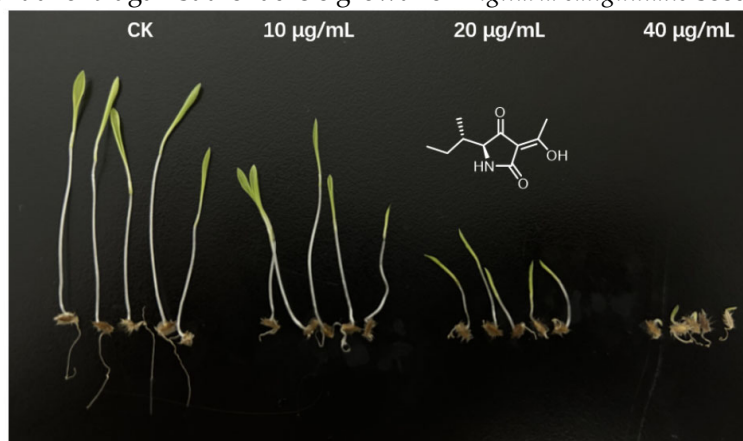Table S1. Herbicidal spectrum of **9** against representative malignant weeds *D. sanguinalis*, *Portulaca oleracea*, and *Descurainia sophia*.

| Weeds                 | Compounds       | 40 µg/mL | 20       | 10       |
|-----------------------|-----------------|----------|----------|----------|
| <i>D. sanguinalis</i> | <b>9</b>        | 88.6±2.1 | 84.1±1.5 | 73.2±1.9 |
|                       | CK <sup>a</sup> | 90.5±1.8 | 85.7±3.2 | 76.1±2.3 |
| <i>P. oleracea</i>    | <b>9</b>        | 71.9±2.2 | 62.6±1.4 | n.d.     |
|                       | CK <sup>a</sup> | 89.2±2.9 | 81.3±1.7 | n.d.     |
| <i>D. sophia</i>      | <b>9</b>        | 69.2±1.6 | 55.8±2.4 | n.d.     |
|                       | CK <sup>b</sup> | 86.7±1.3 | 74.8±1.1 | n.d.     |

<sup>a,b</sup> CK was chemical herbicide acetochlor <sup>a</sup> and tribenuron-methyl <sup>b</sup>, respectively. n.d.: not detected.
